# Supplementary material for: Predictive value of indicators for identifying child maltreatment and intimate partner violence in coded electronic health records: a systematic review and meta-analysis
Source: PubMed Central journal article supplement — Arch Dis Child. 2020 Aug 11;106(1):44–53. doi: 10.1136/archdischild-2020-319027 (PMC7788194; doi:10.1136/archdischild-2020-319027), 2020-08-11
Supplement: archdischild-2020-319027supp001.pdf [file archdischild-2020-319027supp001.pdf]

## Online supplementary material

### **Predictive value of indicators for identifying child maltreatment and intimate partner violence in coded electronic health records: a systematic review and meta-analysis**

Table S1. Review deviations from the original PROSPERO protocol

Table S2. Search strategy used in this systematic review and meta-analysis

Table S3. Eligible sources for obtaining independent reference standards for assessing electronic health records

Table S4. Modified version of the Revised Tool for the Quality Assessment of Diagnostic Accuracy Studies (QUADAS-2) with rankings of reference standard and exclusion made in comparison groups

Table S5. Additional information on methods for evaluating coding quality and sources of misclassifications

Table S6. Selected study characteristics of included studies by outcome

Table S6. Selected study characteristics of included studies by outcome (continued)

Table S7. Individual study QUADAS-2 scores by outcome<sup>a</sup>

Table S8. Codes used for identifying CM, NAS, FAS, or IPV by individual study, indicator and care setting

Table S8. Codes used for identifying CM, NAS, FAS, or IPV by individual study, indicator and care setting (continued)

Figure S1. Primary diagnoses for neonatal abstinence syndrome: pooled positive predictive values of individual studies

Figure S2. Primary diagnoses for fetal alcohol syndrome: pooled positive predictive values of individual studies

Figure S3. Primary diagnoses for CM: Pooled positive predictive values of individual studies

Figure S4. CM and abusive head trauma: Pooled positive predictive values of individual studies

Figure S5. CM and traumatic brain injury: Pooled positive predictive values of individual studies

Figure S6. CM and skull fracture: Pooled positive predictive values of individual studies

Figure S7. CM and subdural haematoma: Pooled positive predictive values of individual studies

Figure S8. CM and retinal haemorrhages: Pooled positive predictive values of individual studies

Figure S9. CM and upper limb fractures: Pooled positive predictive values of individual studies

Figure S10. CM and lower limb fractures: Pooled positive predictive values of individual studies

Figure S11. CM and rib fractures: Pooled positive predictive values of individual studies

Figure S12. CM and multiple burns: Pooled positive predictive values of individual studies

Figure S13. CM and assaults: Pooled positive predictive values of individual studies

Figure S14. Combination of assaults, adversity, CM and social risk factors for identifying CM: Pooled positive predictive values of individual studies

Figure S15. Primary diagnoses for IPV: Pooled positive predictive values of individual studies

Figure S16. IPV and ocular injuries (e.g., orbital fractures): Pooled positive predictive values of individual studies

Figure S17. IPV and facial fractures: Pooled positive predictive values of individual studies

Figure S18. IPV and upper body contusions: Pooled positive predictive values of individual studies

Figure S19. IPV and assaults: Pooled positive predictive values of individual studies

Table S9. Subgroup analyses for the pooled positive predictive values of neonatal abstinence syndrome, fetal alcohol syndrome and child maltreatment\*

Table S10. Subgroup analyses for the pooled positive predictive values of injury presentations for child maltreatment\*

Table S11. Meta-regressions: influence of publication year on the pooled PPV by outcome for indicators with at least four studies\*

Figure S20. Prevalence of misclassifications due to coding errors in studies reporting on NAS, CM, and IPV

Figure S21. Prevalence of missing perpetrator information in women's medical charts coded as assaults

Figure S22. Funnel plot for studies reporting on neonatal abstinence syndrome

Figure S23. Funnel plot for studies reporting on primary diagnoses of child maltreatment

Figure S24. Funnel plot for studies reporting on skull fractures as an indicator of child maltreatment

Figure S25. Funnel plot assessment for studies reporting on assault presentations as an indicator of intimate partner violence

Table S12. Online supplementary references

Table S13. References of included studies in this systematic review and meta-analysis

Table S14. Meta-analyses Of Observational Studies in Epidemiology Checklist (MOOSE)

Table S15. Preferred Reporting Items for a Systematic Review and Meta-analysis of Diagnostic Test Accuracy Studies (PRISMA-DTA)

**Table S1. Review deviations from the original PROSPERO protocol**

1. Given the limited amount of eligible studies, we decided not to conduct bivariate random-effects models to measure the pooled sensitivity and specificity of coded indicators to account for the variation of underlying prevalences between studies on family violence. Whilst some studies reported sensitivity, the high volume of eligible patients presenting to healthcare combined with the rare occurrence and underreporting of all family violence limits the feasibility to apply a reference standard to non-coded cases to ascertain false negatives. Reliable measures on sensitivity are therefore unlikely to be obtained without a bivariate random-effects model. We therefore decided to focus the review solely on positive predictive values.
2. We decided to include studies without specific code lists given that the study met all other criteria, and reported on a specific coding system and coding terms adequately enough to classify indicators into relevant categories. This posthoc decision was made to allow for inclusion of studies assessing broader indicators of family violence such as combinations of multiple codes for adversity.

**Table S2. Search strategy used in this systematic review and meta-analysis****1. Sources:**

We searched the following sources from 1970 to inception:

**Electronic databases:** MEDLINE, EMBASE, PsychINFO, Maternity & Infant Care Database, AMED, Global Health Archives, Web of Science (Ovid), PubMed, CINAHL Plus, Child Development & Adolescent Studies, British Education Index, Web of Science, SCOPUS, ERIC, Proquest Central, Science Citation Index, Cochrane library (Wiley), DARE.

**Trial registers:** EU-CTR, ISRCTN, ClinicalTrials.gov

**Grey literature:** Google Scholar, Open Grey, ProQuest Dissertations & Theses Global and web links from relevant organisational websites including WHO Global Health Library.

**References of screened literature reviews and/or annotated bibliographies:** Clinical Practice Research Datalink biography<sup>1</sup>, CM, IPV, alcohol misuse<sup>2-4</sup>, drug misuse<sup>5-9</sup>, family dysfunction<sup>10-13</sup>, mental health problems<sup>14-17</sup>, suicide and self-harm,<sup>18-21</sup> physical injuries<sup>22-24</sup>, violent injuries<sup>25-27</sup>, multiple adversities<sup>28,29</sup>, and [www.apps.who.int/violence-info](http://www.apps.who.int/violence-info).

**Journals:** JAMA, JAMA Psychiatry, JAMA Paediatrics, the Lancet, the Lancet Psychiatry, Lancet Public Health, The Lancet Child & Adolescent Health, Traumatology, BJPsych, Psychiatric services, BMJ Injury Prevention and the BMC journals.

**Code repositories:**

- <https://clinicalcodes.rss.mhs.man.ac.uk/>
- <https://www.caliberresearch.org/portal/phenotypes>
- [https://www.phpc.cam.ac.uk/pcu/cprd\\_cam/codelist/](https://www.phpc.cam.ac.uk/pcu/cprd_cam/codelist/)
- [https://data.bris.ac.uk/data/organization/health-sciences-org?q=cprd&sort=score+desc%2C+metadata\\_modified+desc](https://data.bris.ac.uk/data/organization/health-sciences-org?q=cprd&sort=score+desc%2C+metadata_modified+desc)
- <https://www.rcgp.org.uk/clinical-and-research/resources/toolkits>
- [https://nccd.cdc.gov/dph\\_ardi/info/icdcodes.aspx](https://nccd.cdc.gov/dph_ardi/info/icdcodes.aspx)

**Expert recommendations:** Prominent researchers, policy experts and clinicians within the field with at least one contact from each of the five WHO defined continents.

**2. Search terms:**

The following search terms were applied across sources using the PICO structure and combined using Boolean operators and MESH terms:

**CM and IPV:** (*abuse\* OR maltreat\* OR neglect\* OR malnutriti\* OR violen\* OR mistreat\* OR trauma\* OR adversity\* OR "adverse childhood\*" OR assault\* OR fight OR mutilate\* OR mutilation\* OR fgm OR battering OR battered OR exploitation OR crushed OR rape OR strike\* OR struck OR stabb\* OR drown\* OR homicide\* OR murder\* OR molest\* OR hardship OR tragedy OR harass\* OR stalk OR "lack\$of" OR street\* OR shelt\* OR "looked after" OR "child in care" OR "out\$of\$home\$care" OR "child in need" OR "child protect\*" OR "foster care" OR "foster family" OR "substitute family" OR "vulnerable child" OR "act 1989" OR "act 1995" OR "order 1995" OR orphan OR asylum OR unwanted OR refugee OR displaced OR escape\* OR fugitive OR exile OR "at\$risk" OR "neonatal abstin\*" OR NAS OR "substance withdrawal" OR "opiod misuse\*" OR "maternal substance\*" OR "substance-exposed newborn" OR "neonatal drug withdrawal" OR "opioid dependency" OR "perinatal substance" OR "antenatal substance" OR "prenatal\* drug" OR "pre-natal\* drug expos\*" OR embryopath\* OR "neurodevelopmental\* disorder\*" OR "birth defect\*" OR arnd OR arbd OR "fetal\$alcohol\*" OR "foetal\$alcohol\*" OR fae OR fas OR fasd OR "fetal alcohol spectrum disorder\*" OR "alcohol syndrome\*" OR "prenatal\* alcohol" OR "pre-natal\* alcohol expos\*").[ti,ab]*

**Design:** AND ("electronic\$health\$record\*" OR "electronic\$medical\$record\*" OR "routine\$data" OR "administrative\$data" OR "registry" OR "electronic\$data" OR "registry\*" OR "icd\*" OR "read\$code" OR "codes").[ti,ab]

**Outcome:** AND (specifici\* OR accura\* OR sensi\* OR reliabilit\* OR valid\* OR "chart\$review" OR "manual\$review" OR "medical\$record\$review" OR "substantiated" OR "verifi\*" OR "confirmed" OR "linked" OR "linkage" OR surveillance\*).[ti,ab]

\*/\$ Search term wildcard.

**3. Limitations:**

All searches were limited to studies published in English, Swedish and German without year restriction.

**4. Method for addressing articles published in languages other than English:**

Given that study titles were indexed in English, we retrieved all potentially eligible non-English language studies published in German and Swedish. Full texts were uploaded to Google's [document translation service](https://www.google.com/translate/) for automatic translation. Each document was then checked for accurate translations by either a native Swedish speaker (S.S) or a native German speaker (M.S) and made available to the remaining reviewers.

**Table S3. Eligible sources for obtaining independent reference standards for assessing electronic health records**

| Independent reference standard                                                                                                                                                                                                                                                                                                                                                                                                                                                                                                                                                                                                                                                                                                                                                                                                                                                                                                                                                                                          |
|-------------------------------------------------------------------------------------------------------------------------------------------------------------------------------------------------------------------------------------------------------------------------------------------------------------------------------------------------------------------------------------------------------------------------------------------------------------------------------------------------------------------------------------------------------------------------------------------------------------------------------------------------------------------------------------------------------------------------------------------------------------------------------------------------------------------------------------------------------------------------------------------------------------------------------------------------------------------------------------------------------------------------|
| <ul style="list-style-type: none"> <li>Independent and blinded manual chart review of full medical, social and/or criminal records (either as extracted or by re-coding charts for direct comparison of codes).</li> <li>Non-blinded manual chart review of full medical records (extracted or by re-coding for direct comparison of codes).</li> <li>The individual meets criteria defined by a validated instrument (e.g., self-report survey) completed within one-month of the coded-EHR.</li> <li>Clinician confirms case via a self-report survey administered to the service.</li> <li>Linkage of the same individual to another independent non-health-related database that provides concordance of the diagnosis by a qualified professional (e.g., social worker, police etc.).</li> <li>Linkage of the same individual to another healthcare database that provides concordance of the diagnosis (e.g., similar diagnosis recorded in both hospital discharge and general practitioner records).</li> </ul> |

Eligibility of sources for obtaining reference standards broadly adapted from Nissen et al.<sup>30</sup>

**Table S4. Modified version of the Revised Tool for the Quality Assessment of Diagnostic Accuracy Studies (QUADAS-2) with rankings of reference standard and exclusion made in comparison groups**

| Description                                                                                                                                                                                                                                                                                                                             |                |
|-----------------------------------------------------------------------------------------------------------------------------------------------------------------------------------------------------------------------------------------------------------------------------------------------------------------------------------------|----------------|
| The QUADAS-2 provides criterion to assess the quality of validation studies across two overall domains concerning risk of bias: (1) validity methods, and (2) level of applicability and generalisability to practice.                                                                                                                  |                |
| Risk of bias: validity methods                                                                                                                                                                                                                                                                                                          | Quality rating |
| <b>1. Patient selection</b>                                                                                                                                                                                                                                                                                                             |                |
| <ul style="list-style-type: none"> <li>Population selection criteria clearly described &amp; reported the numbers excluded from the analyses with reason(s) explained, or there were no exclusions.</li> </ul>                                                                                                                          | 1 (high)       |
| <ul style="list-style-type: none"> <li>Population selection criteria unclear/ did not report the numbers excluded</li> </ul>                                                                                                                                                                                                            | 0 (low)        |
| <b>2. Index test (i.e. indicators/codes)</b>                                                                                                                                                                                                                                                                                            |                |
| <ul style="list-style-type: none"> <li>Specific codes (primary vs primary or secondary diagnoses) reported in the main paper or the supplement</li> </ul>                                                                                                                                                                               | 1 (high)       |
| <ul style="list-style-type: none"> <li>No specific codes reported, but used a recognised coding system and reported on related coding terms.</li> </ul>                                                                                                                                                                                 | 0 (low)        |
| <b>3. Level of certainty for distinguishing CM/IPV from non-CM/IPV applied by reference standard</b>                                                                                                                                                                                                                                    |                |
| Quality ratings correspond to the level of certainty that the reference standard is a true measure of CM or IPV. Ratings 1-5 apply to CM, 1-4 apply to NAS and FAS, and 1-3 apply to IPV.                                                                                                                                               |                |
| <ul style="list-style-type: none"> <li>CM/IPV confirmed at case conference or family, civil, or criminal court proceedings; admitted by perpetrator; or witnessed abuse AND non-CM actively excluded by stated criteria (e.g., witnessed accidental cause, caused by metabolic bone diseases etc).</li> </ul>                           | 5 (high)       |
| <ul style="list-style-type: none"> <li>CM/IPV confirmed by stated criteria including multidisciplinary assessment AND non-CM/IPV actively excluded by stated criteria.</li> </ul>                                                                                                                                                       | 4              |
| <ul style="list-style-type: none"> <li>CM/IPV defined by stated criteria AND source verifying non-CM/IPV merely stated.</li> </ul>                                                                                                                                                                                                      | 3              |
| <ul style="list-style-type: none"> <li>CM/IPV stated, but no supporting detail is given AND source verifying non-CM/IPV merely stated.</li> </ul>                                                                                                                                                                                       | 2              |
| <ul style="list-style-type: none"> <li>Suspected CM/IPV AND no criteria stated for verifying non-CM/IPV.</li> </ul>                                                                                                                                                                                                                     | 1 (low)        |
| <b>4. Were the reference standard interpreted without knowledge of the results from the index test (e.g. blinding, did not know which case had positive code)?</b>                                                                                                                                                                      |                |
| <ul style="list-style-type: none"> <li>Blinded chart review (e.g. review of records without knowledge of abuse status) or/and external linkage/independent review.</li> </ul>                                                                                                                                                           | 1 (high)       |
| <ul style="list-style-type: none"> <li>The reviewers knew the coded classification or no information provided regarding the reviewer's knowledge.</li> </ul>                                                                                                                                                                            | 0 (low)        |
| <b>5. Flow and timing</b>                                                                                                                                                                                                                                                                                                               |                |
| *Alternative option provided for reference standards based on external linkage for verification.                                                                                                                                                                                                                                        |                |
| <ul style="list-style-type: none"> <li>The information used in the reference standard was the same as the information used at the time of coding (applicable: chart reviews).</li> </ul>                                                                                                                                                | 1 (high)       |
| <ul style="list-style-type: none"> <li>The period between linkage for verification and the initial diagnosis was short enough (1 year maximum) to be reasonably sure that the target condition did not change relative to the original coding classification? (applicable: studies using external linkage for verification).</li> </ul> | 1 (high)*      |
| <ul style="list-style-type: none"> <li>The information used to make the reference standard diagnosis was not the same as the information used at the time of coding (e.g. extra material gathered from other departments).</li> </ul>                                                                                                   | 0 (low)        |
| <ul style="list-style-type: none"> <li>The period between external linkage for verification and the initial diagnosis was more than 1 year.</li> </ul>                                                                                                                                                                                  | 0 (low)*       |
| <ul style="list-style-type: none"> <li>Insufficient published data.</li> </ul>                                                                                                                                                                                                                                                          | 0/U (unclear)  |
| Risk of bias: Applicability and generalisability                                                                                                                                                                                                                                                                                        | Risk of bias   |
| <b>6. Patient selection</b>                                                                                                                                                                                                                                                                                                             |                |
| <ul style="list-style-type: none"> <li>The study included patients diagnosed and treated in a representative mixture of general health settings, and the population was otherwise relatively unselected.</li> </ul>                                                                                                                     | 1 (low)        |
| <ul style="list-style-type: none"> <li>The study was performed in a selected population (e.g. restricted to patients admitted to a trauma/burn/victim unit, where awareness and coding performance of abuse might be higher)</li> </ul>                                                                                                 | 0 (high)       |
| <ul style="list-style-type: none"> <li>Insufficient published information.</li> </ul>                                                                                                                                                                                                                                                   | 0/U (unclear)  |
| <b>7. Index test (indicators)</b>                                                                                                                                                                                                                                                                                                       |                |
| <ul style="list-style-type: none"> <li>Codes were initially assigned by hospital coders or treating clinicians as part of routine patient care stored in seemingly accessible database management system.</li> </ul>                                                                                                                    | 1 (low)        |
| <ul style="list-style-type: none"> <li>Reported codes were assigned by surveillance personnel, subject experts or the study authors for the purpose of diagnostic comparison or for use in selected service audits (i.e. where coding methods and performance might be higher).</li> </ul>                                              | 0 (high)       |
| <ul style="list-style-type: none"> <li>Insufficient published information.</li> </ul>                                                                                                                                                                                                                                                   | 0/U (unclear)  |
| <b>8. Reference standard</b>                                                                                                                                                                                                                                                                                                            |                |
| <ul style="list-style-type: none"> <li>The whole sample/random selection/broader sample (e.g. broad range of injuries/presentations) were assessed with the reference standard, with a reasonably low likelihood of missed cases?</li> </ul>                                                                                            | 1 (low)        |
| <ul style="list-style-type: none"> <li>Some of the samples did not receive the reference standard or the codes formed part of the reference standard (e.g., reference standard only applied to cases with CM/IPV specific-coded diagnoses).</li> </ul>                                                                                  | 0 (high)       |
| <ul style="list-style-type: none"> <li>Insufficient published information.</li> </ul>                                                                                                                                                                                                                                                   | 0/U (unclear)  |

The QUADAS-2 has been modified for assessing studies of administrative data/electronic health records as in McCormick et al.,<sup>31</sup> and the ratings of CM and IPV were adapted from Maguire et al.<sup>32</sup> Depending on outcome, studies could achieve a maximum total score accordingly: CM=12; NAS & FAS= 11; IPV=10. Abbreviations: CM=Child maltreatment; EHR=Electronic health records; FAS=Fetal alcohol syndrome; NAS=Neonatal abstinence syndrome.

---

**Table S5. Additional information on methods for evaluating coding quality and sources of misclassifications**

---

We examined documentation quality and potential sources of misclassifications by pooling the proportions of coded medical charts (identified using indicator) with missing information required to meet criteria by the independent reference standard:

- For IPV, we pooled the proportion of coded assault indicators with missing data on perpetrator status in the underlying medical charts (No. of assault records with missing perpetrator status/No. of assaults records). Missing perpetrator information prohibits the assignment of IPV specific outcomes by all reference standards, and further assignment of specific ICD codes (e.g. ICD-9-CM=E967.3. Battering by intimate partner; ICD-10= Y07.0. Other maltreatment by spouse or partner).
- For FAS, we included studies that evaluated coded FAS indicators with missing information on maternal alcohol status in the underlying medical charts (o. of coded records with FAS indicator with missing maternal alcohol status/ No. of coded records with FAS indicator). Missing alcohol status was the most frequent reason for not meeting criteria by a reference standard across included studies.

We examined coding misclassifications by pooling the proportion of miscoded indicators for any outcome:

- Misclassifications were defined as the discordance/disagreement between the original codes (i.e. indicator) and the reference standard when adequate information was available in the underlying medical charts or discharge notes to assign a more appropriate code. Estimates were based on studies explicitly stating the proportion of misclassifications (e.g. No. of individuals with wrongly classified codes following re-coding of the data / No. of individuals with originally assigned codes by hospital coder).

All proportions were pooled using a random-effects intercept logistic regression with the logit transformation when at least three studies were available for the same outcome.<sup>33</sup>

---

**Table S6. Selected study characteristics of included studies by outcome**

| Source                                    | Indicator | Country, period | D | Setting               | No. of centres, data source                                                                                                                  | N       | Mean age years, range        | Prev, % | Coding sys   | Ref | Definition reference standard/alternative reference standard                                                                                                              |
|-------------------------------------------|-----------|-----------------|---|-----------------------|----------------------------------------------------------------------------------------------------------------------------------------------|---------|------------------------------|---------|--------------|-----|---------------------------------------------------------------------------------------------------------------------------------------------------------------------------|
| <b>Neonatal Abstinence Syndrome (NAS)</b> |           |                 |   |                       |                                                                                                                                              |         |                              |         |              |     |                                                                                                                                                                           |
| Lind, 2019 <sup>abcde</sup> <sup>34</sup> | NAS       | USA, 2015-2016  | C | Inpatient & SURVL     | State-wide (New Mexico, Vermont & Illinois), HDDS & birth defects surveillance data & Medicaid data                                          | 44-1563 | NR                           | 0.003   | ICD-9-CM/-10 | CR  | Verification for meeting NAS CDC case definition (3 criteria, incl. FNAS score >8)                                                                                        |
| Maalouf, 2019 <sup>b</sup> <sup>35</sup>  | NAS       | USA, 2009-2011  | L | Inpatient             | NR, TennCare, Tennessee's Medicaid program                                                                                                   | 950     | 25.9 <sup>d</sup>            | 0.77    | ICD-9        | CR  | Verification by two physicians using stated criteria incl. recorded physician diagnosis and/or a FNAS score of >4/Stricter: + recorded required pharmacological treatment |
| Lind, 2015 <sup>36</sup>                  | NAS       | USA, 2010-2011  | C | Inpatient & SURVL     | 3 hospitals, Florida's discharge data linked to birth certificates & NICUs                                                                   | 413     | 27.4 <sup>d</sup>            | 1.07    | ICD-9        | CR  | Verification for meeting all three CDC defined NAS criteria /Stricter: FNAS score >8                                                                                      |
| Phillips-Bell, 2019 <sup>37</sup>         | NAS       | USA, 2015       | C | Inpatient             | 3 hospitals, Linked Florida hospital discharge database to infant records                                                                    | 303     | NR                           | NR      | ICD-9-CM     | CR  | Verification for meeting all three defined criteria of NAS or FNAS >8 /Stricter: only FNAS score >8                                                                       |
| Chisamore, <sup>38</sup> 2016             | NAS       | USA, 2000-2014  | C | Inpatient             | 1 hospital with NICU, St. Joseph's Health Centre                                                                                             | 278     | 24-33 <sup>§</sup>           | NR      | ICD-10       | CR  | Verification of maternal opioid exposure through confirmed drug screen and/or self-admitted use/Stricter: Recorded required pharmacological treatment of child            |
| Yam, 2019 <sup>39</sup>                   | NAS       | USA, 2000-2006  | L | Inpatient & SURVL     | 1 medical centre, Campbelltown Hospital, Sydney                                                                                              | 253     | 29                           | 1.36    | ICD-10       | CR  | Verification by one researcher for maternal opioid exposure and child required NAS medications/ Stricter: FNAS score ≥8                                                   |
| Patrick, 2015 <sup>40</sup>               | NAS       | USA, 2008-2011  | C | Inpatient             | 3 Hospitals, TennCare, Tennessee's Medicaid program                                                                                          | 228     | median: 24 <sup>d</sup>      | 0.97    | ICD-9-CM     | CR  | Verification of prescription opioid using recorded drug test or/and "infant history or drug screening"                                                                    |
| Maalouf, 2019 <sup>a</sup> <sup>35</sup>  | NAS       | USA, 2016       | C | Inpatient             | 1 hospital, TennCare, Tennessee's Medicaid program                                                                                           | 217     | 25.9 <sup>d</sup>            | 0.77    | ICD-10-CM    | CR  | As in Maalouf (2019b) <sup>35</sup>                                                                                                                                       |
| Alsalem, 2019 <sup>†</sup> <sup>41</sup>  | NAS       | USA, 2013-2016  | C | Inpatient             | 2 NICUs/hospitals, Women's/Children's Hospital of hospital & Millard Fillmore Suburban Hospital                                              | 110     | 28 <sup>d</sup>              | NR      | ICD-9        | CR  | Verification for meeting NAS criteria (incl. modified FNAS score >8)                                                                                                      |
| Umer, 2019 <sup>42</sup>                  | NAS       | USA, 2017       | C | Inpatient & SURVL     | NR, Western Virginia Surveillance database on all births from all hospitals                                                                  | 79      | NR                           | 0.053   | ICD-10-CM    | CR  | Verified by nurse survey for intrauterine exposure to a neuro-active substance, clinical signs of withdrawal, regardless of pharmacological treatment                     |
| Huybrechts, <sup>43</sup> 2017            | NAS       | USA, 2000-2010  | C | Inpatient             | NR, obstetrical care centres in the Partners HealthCare system                                                                               | 57      | Mean: 24.6-28.4 <sup>d</sup> | 1.23    | ICD-9        | CRB | Verification of physician diagnosis or recorded required NAS treatment of child                                                                                           |
| <b>Fetal Alcohol Syndrome (FAS)</b>       |           |                 |   |                       |                                                                                                                                              |         |                              |         |              |     |                                                                                                                                                                           |
| Miller, 2002 <sup>44</sup>                | FAS       | USA, 1995-1997  | L | Inpatient & SURVL     | NR, FASSNet surveillance registry & hospitals, clinics, early intervention programs & Medicaid Database across Alaska, Arizona, Colorado, NY | 1489    | NR, babies                   | 0.0004  | ICD-9        | CR  | Verification for FAS using stated criteria/Stricter: Definite/probable                                                                                                    |
| Egeland, 1998 <sup>45</sup>               | FAS       | USA, 1977-1993  | C | Inpatient             | NR, multiple sources of FAS referral centres in Alaska                                                                                       | 630     | Median: 0.6                  | 0.0013  | ICD-9        | CR  | Verification for a physician for diagnosis/suspected FAS and/or meeting a defined criterion of FAS/Stricter: meeting all stated criteria                                  |
| Welty, 1995 <sup>46</sup>                 | FAS       | USA, 1981-1991  | L | Inpatient & ED        | 8 Health Services, Aberdeen Area involving Indian Health Services                                                                            | 251     | 8, 0-31                      | 0.003   | ICD-9        | CR  | Verification for five stated criteria of FAS/Stricter: Meeting all criteria                                                                                               |
| Miller, 1995 <sup>47</sup>                | FAS       | USA, 1992-1994  | L | Inpatient & SURVL     | NR, Colorado Registry for Children with Special Needs, birth defects surveillance                                                            | 173     | 0-3                          | 0.0003  | ICD-9-CM     | CR  | Verification for FAS using stated criteria of definitive or problem/Stricter: Definite/probable                                                                           |
| Harris, 2003 <sup>48</sup>                | FAS       | AU, 1990-2000   | L | Inpatient/o utpatient | NR, Top End/the Northern Territory                                                                                                           | 117     | 0-10                         | 0.0007  | ICD-9/10     | CR  | Verification for meeting ≥1 defined FAS criterion/Stricter: meeting all four stated defined FAS criteria                                                                  |
| Allen, 2007 <sup>49</sup>                 | FAS       | AU, 1995-2002   | L | Inpatient             | NR, Victoria and the Victorian Birth Defects Register                                                                                        | 117     | 0 (babies)                   | 0.00001 | ICD-9/10     | CR  | Verification for three classical facial features of FAS using stated criteria.                                                                                            |
| Fox, 2003 <sup>50</sup>                   | FAS       | USA, 1995-1997  | L | Inpatient & SURVL     | NR, NY Congenital Malformations Registry & FASSNet surveillance registry                                                                     | 57      | ≤2                           | 0.0004  | ICD-9-CM     | EL  | Verification for confirmed or suspected FAS by uniform CDC criteria                                                                                                       |

**Table S6. Selected study characteristics of included studies by outcome (continued)**

| Source                         | Indicator                       | Country, period          | D | Setting              | No. of centres, data source                                                                           | N      | Mean age years, range      | Prev, % | Coding sys         | Ref     | Definition reference standard/alternative reference standard                                                                        |
|--------------------------------|---------------------------------|--------------------------|---|----------------------|-------------------------------------------------------------------------------------------------------|--------|----------------------------|---------|--------------------|---------|-------------------------------------------------------------------------------------------------------------------------------------|
| <b>Child maltreatment (CM)</b> |                                 |                          |   |                      |                                                                                                       |        |                            |         |                    |         |                                                                                                                                     |
| Gumbs, 2013 <sup>51</sup>      | CM                              | USA, 1998-2005           | L | Inpatient/outpatient | Nationwide military families, US Defence DoD Birth and Infant Health Registry                         | 676827 | ≤1                         | 0.0003  | ICD-9-CM           | EL      | Substantiated/probable AHT by positive match in CPS registry 1 week before, or within 60 days of AHT diagnosis                      |
| O'Donnell, 2012 <sup>52</sup>  | CM/A                            | AU, 2001-2005            | L | ED                   | NR, EDs in Western Australia linked to CPS/Hospital/birth data                                        | 657656 | ≤17                        | 0.03    | ICD-10             | EL      | Positive match for CM substantiation/allegation within 5 years/Stricter: CM substantiation 2 days pre & 5 days post-ED presentation |
| O'Donnell, 2010 <sup>53</sup>  | CM/A                            | AU, 1990-2005            | L | Inpatient            | NR, All Births in Western Australia eligible linked to CPS/hospital data                              | 397346 | 0-5                        | 3.43    | ICD-10             | EL      | Positive match for CM notification within 4 days (73%) /Stricter: CM substantiation                                                 |
| Parrish, 2013a <sup>54</sup>   | CM                              | USA, 2005-2010           | C | Inpatient & SURVL    | 24 hospitals, Alaska trauma registry linked to Hospital/Medicaid/Violent Death reporting system       | 130683 | ≤2                         | 0.03    | ICD-9-CM/10-CM     | EL      | Positive match for CM across 7 trauma, hospital, claims and death databases using algorithm                                         |
| Schnitzer, 2004 <sup>55</sup>  | CM                              | USA, 2002-2003           | C | Inpatient & ED       | NR, Missouri Division of Family Services linked to Patient Abstract System                            | 6121   | ≤9                         | 0.74    | ICD-9-CM           | CR & EL | Positive match for substantiated CM recording & 10% random sample verified by CR for CM allegation /Stricter: substantiated only    |
| Schnitzer, 2011 <sup>55</sup>  | CM/COMB/A/RF/BURN/POI/SN/SF/SDH | USA, 2000                | C | Inpatient & ED       | NR, Missouri Patient Abstract System of discharges & linked ED visits                                 | 2826   | ≤9/≤9/≤4/≤2/≤4/≤4/≤4/≤4/≤4 | NR      | ICD-9              | CR      | Verification for carer behaviour with risk of possible CM, with cases discussed at weekly team meeting/ Stricter: Probable CM       |
| Raghavan, 2015 <sup>56</sup>   | CM/COMB/A                       | USA, 1999-2002           | C | Inpatient            | NR, First National Survey of Child and Adolescent Well-Being linked to Medicaid claims from 36 states | 2136   | ≤18                        | NR      | ICD-9-CM           | EL      | Social caseworker determinations of CM in linked survey                                                                             |
| Hooft, 2015 <sup>57</sup>      | CM/TBI                          | USA, 2007-2010           | C | Inpatient            | 4 Hospitals, Yale-New Haven, Connecticut, Philadelphia, New York                                      | 936    | ≤3 <sup>f</sup>            | NR      | ICD-9-CM           | CR      | Verification for evaluation by CM paediatrician                                                                                     |
| McKenzie, 2012 <sup>58</sup>   | CM                              | AU, 2003-2006            | C | Inpatient            | 20 hospitals stratified by size, Queensland                                                           | 895    | 8.3, ≤18                   | NR      | ICD-10-AM          | EL & CR | Positive CPS match & CR verification by 2 researchers for CM cues/Stricter: Recorded CPS event                                      |
| Krawiec, 2019 <sup>59</sup>    | CM                              | USA, 2009-2014           | C | Inpatient            | 1 Institution with CPS referrals, Penn State Children's Hospital                                      | 666    | 0-18                       | NR      | ICD-9-CM/SNOMED CT | CR      | Verification of CM by CPT                                                                                                           |
| Karatekin, 2018 <sup>60</sup>  | CM                              | USA, 2011-2015           | C | Inpatient & ED       | 8 hospitals, University of Minnesota's Clinical Data Repository                                       | 631    | ≤21                        | 0.02    | ICD-9              | CR      | Verification/agreement between 11 research assistants for appropriate CM code assignment                                            |
| Paroskie, 2014 <sup>61</sup>   | CM                              | USA, 2007-2012/2009-2012 | C | Inpatient & ED       | 2 Hospitals, billing data from Vanderbilt University & Children's Mercy Hospitals                     | 427    | 0-14                       | NR      | ICD-9              | CR      | Bruising & injuries concerning for NAI by the study team                                                                            |
| Garza, 2019a <sup>62</sup>     | CM/A <sup>e</sup>               | USA, 2012-2013           | C | Inpatient            | 1 medical centre, Dell Children's Medical Centre Texas                                                | 391    | ≤18/≤7a                    | NR      | ICD-9              | CR      | Verification for determination of physical abuse by MCPT/ Stricter: CPT confirmation                                                |
| Garza, 2019b <sup>62</sup>     | CM/A <sup>e</sup>               | USA, 2016-2017           | C | Inpatient            | 1 medical centre, Dell Children's Medical Centre Texas                                                | 303    | ≤18/≤7a                    | NR      | ICD-10             | CR      | Verification for determination of physical abuse by MCPT/ Stricter: CPT confirmation                                                |
| Wu, 2015 <sup>63</sup>         | CM/BURN/LLF/ULF/SF/P OISN/SDH   | Taiwan, 2007-2009        | C | Inpatient            | 1 medical centre, southern Taiwan                                                                     | 247    | ≤3                         | 5.26    | ICD-9-CM           | CR      | Meeting criteria per the 28-Criteria of Distinguishing Abuse from Accidents by two experts                                          |
| Berger, 2013 <sup>64</sup>     | CM                              | USA, 2006-2012           | C | Inpatient            | 1 hospital, Children's Hospital of Pittsburgh                                                         | 223    | median: 3.9, ≤4            | NR      | ICD-9-CM           | CR      | Verification by hospital-based CPT for probable/definite AHT                                                                        |
| Durand, 2019 <sup>65</sup>     | CM                              | USA, 2017                | C | Inpatient            | 1 Level one pediatric trauma center                                                                   | 115    | ≤5                         |         | ICD-10             | CR      | CR verification for social work notes /Stricter: CPS report                                                                         |

**Table S6. Selected study characteristics of included studies by outcome (continued)**

| Source                                 | Indicator             | Country, period    | D | Setting        | No. of centres, data source                                                   | N       | Mean age years, range  | Prev,% | Coding sys   | Ref     | Definition reference standard/alternative reference standard                                                                                                             |
|----------------------------------------|-----------------------|--------------------|---|----------------|-------------------------------------------------------------------------------|---------|------------------------|--------|--------------|---------|--------------------------------------------------------------------------------------------------------------------------------------------------------------------------|
| <b>Child maltreatment (CM)</b>         |                       |                    |   |                |                                                                               |         |                        |        |              |         |                                                                                                                                                                          |
| Gessner, 2004 <sup>66</sup>            | CM                    | USA, 1996-2000     | L | Inpatient      | NR, Alaska Division of Family & Youth Services registry for child abuse cases | 68      | ≤1                     | 0.46   | ICD-9        | CR & EL | Positive CPS match & CR verification for physical abuse /Stricter: Social service substantiated CM                                                                       |
| Risen, 2015 <sup>67</sup>              | CM                    | USA, 1995-2012     | C | Inpatient      | 1 Paediatric acute hospital/rehabilitation unit                               | 28      | 20, 0-4.25             | NR     | ICD-9        | CR      | Confirmed CM by MDT & witnessed/confessed CM OR confirmed by expert at a referral centre                                                                                 |
| Högberg, 2019 <sup>68</sup>            | COMB/R F <sup>b</sup> | Sweden, 1997-2014  | L | Inpatient      | Nationwide, All births with a diagnosis in NPR                                | 1855267 | ≤1                     | NR     | ICD-10       | EL      | Positive match for out-of-home-care placement using linkage                                                                                                              |
| Somji, 2011 <sup>69</sup>              | COMB                  | Canada, 1997-2007  | C | ED             | 2 EDs, Hospital for Sick Children & Children's Hospital of Eastern Ontario    | 308     | ≤2                     | NR     | ICD-9/ICD-10 | CR      | Abusive fractures/injuries determined by onsite CPT using defined criteria/ Stricter: Confirmed by CPT                                                                   |
| Tingberg, 2010 <sup>70</sup>           | COMB                  | Sweden, 2005-2008  | C | ED             | 1 ED, Astrid Lindgren Children's Hospital                                     | 301     | ≤18                    | NR     | ICD-10       | CR      | Verification for social service or police referrals and/or determined CM by/Stricter: Social service report filed                                                        |
| Gonzalez-Izquierdo, 2015 <sup>71</sup> | COMB                  | England, 2010-2011 | C | ED             | 1 ED, University College London Hospitals NHS Foundation Trust                | 138     | ≤18                    | 0.0028 | ICD-10       | CR      | Verification of CSS safeguarding notifications                                                                                                                           |
| Evasovich, 1998 <sup>72</sup>          | BURN                  | USA, 1990-1994     | C | Inpatient      | 1 Hospital, Children's Burn Unit, Akron Hospital Medical Centre               | 104     | 3.8, ≤12               | NR     | ICD-9        | CR      | Verification for social service referrals for suspected CM/ Stricter: Convicted parent for CM                                                                            |
| Sharkey, 2018 <sup>73</sup>            | LLF/ULF/RF            | USA, 2007-2010     | C | ED             | 1 ED, non-specified HD in New Haven & Child abuse registry                    | 551     | <3                     | 5.63   | ICD-9        | CR      | Verification by MDT of CM                                                                                                                                                |
| Lavin, 2018 <sup>74</sup>              | ULF/RF/SF             | USA, 2008-2012     | C | ED             | 1 Paediatric ED, admin database                                               | 509     | <1                     | NR     | ICD-9        | CR      | Verification by 2 reviewers for considered CM by initial clinician/CM team or skeletal survey                                                                            |
| Strait, 1995 <sup>75</sup>             | ULF                   | USA, 1990-1993     | C | Out/inpatient  | 1 hospital, Cincinnati Children's Hospital Medical Centre                     | 474     | 0.8, ≤15 mo            | 8.06   | ICD-9        | CR      | Verification for definitive/likely CM using stated criteria/Stricter: Definitive CM                                                                                      |
| Baldwin, 2011 <sup>76</sup>            | LLF                   | USA, 2000-2003     | C | Inpatient      | 1 paediatric tertiary care centre & SCAN database, NR                         | 209     | ≤1.5                   | NR     | ICD-9        | EL      | Positive match in in SCAN database with CPT confirmed diagnosis                                                                                                          |
| Capra, 2013 <sup>77</sup>              | LLF                   | USA, 1995-2004     | C | Inpatient      | 1 Hospital, Hospital for Sick Children                                        | 203     | 3.0, 1-5               | 2.96   | ICD-9/ICD-10 | CR      | Verification of suspected/confirmed CM by stated criteria/CPS notification & positive match in SCAN database/ Stricter: CPS confirmed                                    |
| Ryznar, 2015 <sup>78</sup>             | ULF                   | USA, 2007-2012     | C | Inpatient      | 2 hospitals, Ann & Robert L Children's Hospital & John H. Stroger Hospital    | 142     | 1.2, <1.5              | 8.15   | ICD-9        | CR      | Verification for any reports from the hospital's MCPT/ law enforcement investigation/CPS notification / Stricter: CM determined by CPT                                   |
| Hui, <sup>79</sup> 2008                | LLF                   | USA, 1994-2005     | C | Inpatient      | 1 hospital, Alberta Children's Hospital                                       | 127     | ≤1                     | 7.87   | ICD-9/ICD-10 | CR      | Verification for disagreement between injury and cause, indicative of CM/ Stricter: Definitive CM by criteria                                                            |
| Hansoti, <sup>80</sup> 2008            | LLF                   | Scotland, 2003     | C | ED             | 1 ED, Royal Hospital for Sick Children                                        | 122     | ≤2                     | 4.1    | ICD-10       | CR      | Verification of by senior ED staff for referral to child-protection review / Stricter: Child protection referral                                                         |
| O'Donnell, 2010 <sup>81</sup>          | POISN                 | AU, 1990-2005      | C | Inpatient      | NR, All Births in Western Australia eligible linked to CPS/hospital data      | 68240   | All ages               | 3.43   | ICD-10       | EL      | Positive match for substantiated or allegation of CM/ Stricter: Social service substantiated                                                                             |
| Wood, 2012 <sup>82</sup>               | POISN                 | USA, 2006-2008     | C | Inpatient & ED | 1 hospital, Children's Hospital of Philadelphia                               | 928     | ≤5                     | 3.66   | ICD-9-CM     | CR      | Verification by 2 research for suspected CM recorded by the hospital social workers or the child protection team or for referrals to local CPS/Stricter: Referral to CPS |
| Kim, 2017 <sup>83</sup>                | SF                    | USA, 2008-2015     | C | Inpatient      | 1 Paediatric trauma registry, Cincinnati Children's Hospital Medical Centre   | 563     | <1                     | NR     | ICD-9        | CR      | Verification for suspicion of CM by the CAT and social service interview feedback                                                                                        |
| Lyons, <sup>84</sup> 2016              | SF                    | USA, 2008-2015     | L | ED             | 1 ED, Boston Children's Hospital                                              | 438     | median: 11 mo, 0.4-3.6 | NR     | ICD-9-CM     | CR      | Verification for social work/child protection notification                                                                                                               |
| Lane, 2002 <sup>85</sup>               | SF                    | USA, 1994-2000     | C | Inpatient      | 1 Hospital, Children's Hospital of Philadelphia                               | 414     | <1                     | NR     | ICD-9        | CR      | Verification of recorded CPS referrals/positive abusive skeletal surveys & 100 random charts confirmed by external CM expert/ Stricter: recorded CPS referral only       |



**Table S6. Selected study characteristics of included studies by outcome (continued)**

| Source                                                           | Indicator      | Country, period    | D | Setting              | No. of centres, data source                                                            | N     | Mean age years, range    | Prev, % | Coding sys         | Ref | Definition reference standard/alternative reference standard                                                                                                                   |
|------------------------------------------------------------------|----------------|--------------------|---|----------------------|----------------------------------------------------------------------------------------|-------|--------------------------|---------|--------------------|-----|--------------------------------------------------------------------------------------------------------------------------------------------------------------------------------|
| <b>Child maltreatment (CM)</b>                                   |                |                    |   |                      |                                                                                        |       |                          |         |                    |     |                                                                                                                                                                                |
| Ettaro, 2004 <sup>86</sup>                                       | SF/SDH/TBI     | USA, 1995-1999     | C | Inpatient            | 1 Hospital, Children's Hospital of Pittsburgh                                          | 377   | ≤2                       | NR      | ICD-9-CM           | CR  | Verification of physical examinations/radiographs for "presumptive abuse" or "suspicious for abuse" based on criteria /Stricter: Convicted parent/presumptive CM               |
| Anderst, 2008 <sup>87</sup>                                      | SF             | USA, 2001-2005     | C | ED                   | 2 hospitals, Christus Santa Rosa Children's Hospital/non-specified University Hospital | 349   | 1.1, ≤3                  | NR      | ICD-9              | CR  | Verification of recorded CPS referrals                                                                                                                                         |
| Wood, 2009 <sup>88</sup>                                         | SF             | USA, 1997-2006     | C | Inpatient & ED       | 1 hospital, Children's Hospital of Philadelphia                                        | 341   | <1                       | NR      | ICD-9              | CR  | Verification of skeletal survey findings for potential CM/recorded CPS referrals                                                                                               |
| Rangel, 2009 <sup>89</sup>                                       | SF             | USA, 2003-2008     | C | Inpatient            | 1 hospital, Cincinnati Children's Hospital Medical Centre                              | 260   | <1                       | NR      | ICD-9              | CR  | Verification for social service referral or meeting criteria as "not concerning for abuse," "possible abuse," "probable abuse," or "definite abuse" / Stricter: definite abuse |
| Lasekey, 2013 <sup>90</sup>                                      | SF             | USA, 2004-2010     | C | Inpatient            | 1 Hospital, Trauma Services Registry at Riley Hospital for Children                    | 175   | 5 mo, 0-18 mo            | 1.32    | ICD-9              | CR  | Verification for clinical findings suggestive of abuse (so called, "red flags") by stated criteria incl. CPS or social service referrals                                       |
| Payne, 2016 <sup>91</sup>                                        | RH             | USA, 2004-2014     | C | Inpatient & ED       | 1 Hospital, Cardinal Glennon Children's Medical Centre Missouri                        | 816   | <1                       | NR      | ICD-9              | CR  | Verification for concerns of CM by paediatrician and CM expert                                                                                                                 |
| Hoof, 2013 <sup>92</sup>                                         | RH             | USA, 2007-2010     | C | Inpatient & SURVL    | 1 Hospital, Yale-New Haven Children's Hospital                                         | 133   | ≤3§                      | 0.0015  | ICD-9-CM           | CR  | Meeting CM criteria by CAP, using a 7-point likelihood scale                                                                                                                   |
| Thyen, 1997 <sup>93</sup>                                        | TBI            | USA, 1988-1990     | C | Inpatient            | NR, Hospitalisations in Rochester, Boston or New Haven                                 | 1875  | 5.2, 2-11                | 2.9     | ICD-9              | CR  | Verification of reports to Child Protective Services                                                                                                                           |
| Keenan, 2004 <sup>94</sup>                                       | TBI            | USA, 1998-2001     | C | Inpatient            | 9 PICUS, North Carolina                                                                | 245   | ≤2                       | 0.01    | ICD-9-CM           | CR  | Verification of intracranial injury by trained PICU nurse and CM verification by the project manager (no criteria stated)                                                      |
| Parrish, 2013b <sup>54</sup>                                     | TBI            | USA, 2005-2010     | C | Inpatient & SURVL    | 1 paediatric care centre, Alaska Medical Centre                                        | 186   | ≤2                       | 0.03    | ICD-9-CM-ICD-10-CM | CR  | Verification using stated criteria by two reviewers                                                                                                                            |
| Ricci, 2003 <sup>95</sup>                                        | TBI            | USA, 1992-1994     | C | Inpatient            | 2 Medical centres, Bangor Maine Eastern Maine Medical Centres                          | 94    | 7.5 mo, ≤2               | NR      | ICD-9-N            | CR  | Verification for social service referrals or for meeting criteria according defined criteria / Stricter: Definitive                                                            |
| Myhre, 2007 <sup>96</sup>                                        | TBI/SDH        | Norway, 1995-2005  | C | Inpatient            | 1 Hospital, Trauma Registry Ulleval University                                         | 91    | ≤2                       | NR      | ICD-NR             | CRB | Verification of documented presumptive CM/ Stricter: CPS referral seen by study researcher & external reviewer                                                                 |
| Tzioumi, 1998 <sup>97</sup>                                      | SDH            | AU, 1987-1996      | C | Inpatient            | 1 hospital, Royal Alexandra Hospital for Children                                      | 38    | ≤2                       | NR      | ICD-9-CM           | CR  | Verification for hospital Child Protection Teams diagnosis of confirmed nonaccidental injury                                                                                   |
| <b>Intimate partner violence (IPV) among predominately women</b> |                |                    |   |                      |                                                                                        |       |                          |         |                    |     |                                                                                                                                                                                |
| Kernic, 2000 <sup>98</sup>                                       | A/C/FF         | USA, 1992          | C | Inpatient            | NR, Linkage to Washington State Hospital data/ King County protection records          | 37887 | 18-44                    | 3.58    | ICD-9              | EL  | Positive match protection order database for females being victims to severe types of abuse                                                                                    |
| Lipsky, 2009 <sup>99</sup>                                       | A              | USA, 2004-2005     | C | Inpatient ED & SURVL | 73 hospitals, Dallas Hospital inpatient discharge data linked to Dallas Police Dept    | 32825 | 18-49                    | NR      | ICD-9              | EL  | Positive match to police reported IPV                                                                                                                                          |
| Yau, 2013 <sup>100</sup>                                         | A              | USA, 2000-2007     | C | SURVL                | ≥20 EDs, NYC DOHMH Injury SRUVL/SPARCS                                                 | 22525 | 15-65 <sup>d</sup>       | NR      | ICD-9              | CR  | Verification of assault by ex/current partner by two trained DOHMH staff                                                                                                       |
| Fanslow, 1998 <sup>101</sup>                                     | A              | NZ, 1992-1993      | C | ED                   | 2 EDs, Auckland & Middlemore                                                           | 8051  | 30, 15-81                | 1.02    | ICD-9              | CR  | Agreement in re-coding by a trained nurse                                                                                                                                      |
| Brown, 2005 <sup>102</sup>                                       | A              | USA, 2000-2002     | L | ED                   | 118 EDs, Oklahoma stratified by hospital size                                          | 3988  | 32.0, 16-66 <sup>d</sup> | 0.001   | ICD-9              | CR  | Verification of assault or adult maltreatment committed by a current/ex intimate partner (broad inclusion)                                                                     |
| Biroscaj, 2006 <sup>103</sup>                                    | A              | USA, 1999-2000     | C | ED                   | 23 EDs, Michigan IPV Surveillance System                                               | 3111  | 31, 16-81 <sup>d</sup>   | NR      | ICD-9-CM           | CR  | Verification by ED nurse for physical or sexual violence committed by a current/ex intimate partner (broad inclusion)                                                          |
| Saltzman, 2005 <sup>104</sup>                                    | A <sup>e</sup> | USA, 2000-2001     | C | ED                   | NR, ED data from the National Electronic Injury Surveillance System                    | 2521  | 10-39                    | 9.57    | ICD-9-CM           | CR  | Verified by two researchers as perpetrator being a spouse or partner of the patient                                                                                            |
| Ranney, 2011 <sup>105</sup>                                      | A              | USA, 2004-2007     | C | ED                   | 1 hospital, ED billing database non-specific location                                  | 828   | 16, 10-19                | 0.08    | ICD-9-CM           | CRB | Verification of intentionality and perpetrator by three independent reviewers                                                                                                  |
| Kivelä, 2019 <sup>106</sup>                                      | A <sup>e</sup> | Finland, 2008-2012 | L | Inpatient            | NR, Hospital database for one health care provider district                            | 798   | 15-70 <sup>d</sup>       | 0.00    | ICD-10             | CR  | Verification of violence being classified as related to a partner/ex-partner or spouse/ex-spouse                                                                               |

**Table S6. Selected study characteristics of included studies by outcome (continued)**

| Source                                                           | Indicator          | Country, period      | D | Setting        | No. of centres, data source                                                 | N    | Mean age years, range | Prev, % | Coding sys | Ref         | Definition reference standard/Alternative reference standard                                                                 |
|------------------------------------------------------------------|--------------------|----------------------|---|----------------|-----------------------------------------------------------------------------|------|-----------------------|---------|------------|-------------|------------------------------------------------------------------------------------------------------------------------------|
| <b>Intimate partner violence (IPV) among predominately women</b> |                    |                      |   |                |                                                                             |      |                       |         |            |             |                                                                                                                              |
| Muelleman, 1996 <sup>107</sup>                                   | C/FF               | USA, 1993-1994       | C | ED             | 10 EDs, all women presenting Omaha/Kansas/Missouri                          | 9057 | 34.0, 19-65           | 1.7     | ICD-9/ISS  | Survey & CR | Positive for battering by Flitcraft criteria using CR & survey responses                                                     |
| Bonomi, 2009 <sup>108</sup>                                      | C                  | USA, 2003-2005       | C | Out/inpatient  | NR, Randomly sample of Washington state/northern Idaho insurance plan       | 3568 | 18-64                 | 7.9     | ICD-9      | Survey      | Past IPV per the WEB scale & added BRFS items, assessed via phone                                                            |
| Wong, 2016 <sup>109</sup>                                        | IPV <sup>c</sup>   | Hong Kong, 2010-2014 | L | ED             | 2 EDs, A & E Information System & Clinical Data Analysis & Reporting System | 965  | 32.3-39.8             | NR      | ICD-9      | CR          | Verification for IPV among women by a current co-habiting partner.                                                           |
| Schafer, 2008 <sup>110</sup>                                     | IPV/A <sup>e</sup> | USA, 2000            | C | Inpatient & ED | 58 Hospitals, Oregon EDs & adult inpatient care                             | 677  | 12-50 <sup>d</sup>    | 0.07    | ICD-9-CM   | CR          | Verification of intentional physical or sexual assault by a current or former spouse, nonmarital partner, or dating partner. |
| Muelleman, 1998 <sup>111</sup>                                   | IPV                | USA, 1992            | C | ED             | 1 Hospital, UMKC School of Medicine                                         | 114  | ≥18                   | 0.51    | ICD-9      | CR          | Verification for assault made by present or former husband or boyfriend                                                      |
| Clark, 2014 <sup>112</sup>                                       | OI/FF              | USA, 1995-2013       | C | Out/inpatient  | 1 Hospitals, University of Iowa Hospitals and Clinics                       | 1354 | 32.1-34.5             | 0.005   | ICD-9      | CR          | Verification for relationship of the perpetrator (if known) based on WHO definition.                                         |
| Arosarena, 2009 <sup>113</sup>                                   | OI/FF              | USA, 1998-2004       | C | Out/inpatient  | 2 centres, Kentucky medical services billing records                        | 326  | 35, 19-60             | 0.006   | ICD-9-CM   | CR          | Verification of injuries caused by assault by current/ex-partner or dating relationship.                                     |
| Cohen, 2019 <sup>114</sup>                                       | OI <sup>c</sup>    | USA, 1995-2015       | C | ED             | NR, University of Iowa Hospitals and Clinics                                | 211  | Median: 28            | NR      | ICD-9      | CR          | Verification for assault and IPV using CDC criteria                                                                          |
| Goldberg, 2000 <sup>115</sup>                                    | OI                 | USA, 1984-1996       | C | ED             | 1 medical centre, local database                                            | 41   | ≥13                   | NR      | ICD-9      | CR          | Verification of physical attack by boyfriend or spouse.                                                                      |

Studies are sorted alphabetically by outcome, primary indicator and descending size of sample size.

**Indicators:** A=Assaults, BURN=Multiple Burn Injuries, COMB=Combination of assault and maltreatment and adversity codes, C=Contusions (upper body), LLF=Lower limb fractures, FF=Facial Fractures/injuries, OI=Ocular injuries (mainly orbital fractures), POISN=Poisonings, RH=Retinal Haemorrhage, SDH=Subdural Hematoma, SF=Skull Fractures, RF=Rib fractures, TBI=Traumatic Brain Injury, ULF=Upper Limb Fractures.

**Abbreviations:** AU=Australia, CC=Case-control study, CDC=Centers for Disease Control and Prevention, C=Cross-sectional study, CR=Chart Review, CRB=Chart Review Blinded, CSS=Children's Social Service, CPS=Child Protection Services, CPT=Child Protection Team, D=Study design, ED=Emergency Department, EL=External Linkage, FNAST=Finnegan Neonatal Abstinence Syndrome Tool, HDDS=Hospital Discharge Data System, ICD-10/ICD-9=International Classification of Diseases=10th/9th Revision, ICD-10-CM=ICD-10 Clinical Modification, ICD-10-AM=ICD-10 Australian Modification, L=Longitudinal study, MCPT=Multidisciplinary CPT, mo=months, NZ=New Zealand, NY=New York, NR=Not Reported, NICU=Neonatal Intensive Care Unit, PICU=Paediatric Intensive Care Unit, Prev=Prevalence, Ref=Reference standard, SURVL=Surveillance, SW=Social worker/social services, SCAN=Suspected Child Abuse and Neglect, TR=Trauma registry.

<sup>a</sup> Study comprises six different data sources, with unpublished data provided from three different US states upon request.

<sup>b</sup> Author(s) provided unpublished data upon request.

<sup>c</sup> Author(s) confirmed using ICD codes for initial identification of cases.

<sup>d</sup> Refers to maternal age.

<sup>e</sup> Refers to unpublished dissertation involving two different data sources.

<sup>f</sup> A small proportion (11%-13%) were aged above 3 years old.

<sup>d</sup> Indicates that the study included a small proportion of women above reproductive age including: Brown, 2005=90% aged 18-44 years; Kivelä, 2019= 98% aged 18-59 years; Yau, 2013= 97% aged 15-54 years; Schafer, 2008=95% aged <50 years; Biroscak, 2006=96.8% aged <50 years.

<sup>e</sup> Indicates that study included a small proportion of men which could not be excluded due to inadequate sample description including: Kivelä, 2019=7% were men; Schafer, 2008=4% were men; Saltzman, 2005=17% were men.

**Table S7. Individual study QUADAS-2 scores by outcome<sup>a</sup>**

| Source                                    | EHR setting <sup>b</sup> | Methods   |         |                     |                         |          |             | Applicability          |                  |        |
|-------------------------------------------|--------------------------|-----------|---------|---------------------|-------------------------|----------|-------------|------------------------|------------------|--------|
|                                           |                          | 1. Select | 2. Test | 3. Ref <sup>d</sup> | 3. Ref ex. <sup>e</sup> | 4. Blind | 5. Flow & T | 6. Select <sup>c</sup> | 7. Test          | 8. Ref |
| <b>Neonatal Abstinence Syndrome (NAS)</b> |                          |           |         |                     |                         |          |             |                        |                  |        |
| Lind, 2015                                | HDD/SURVL                | 1         | 1       | 3                   | N/A                     | 0        | U           | 0                      | 0/1 <sup>g</sup> | U      |
| Yam, 2019                                 | HD                       | 1         | 1       | 3                   | N/A                     | 0        | U           | 0                      | 1                | U      |
| Huybrechts, 2017                          | HDD                      | 1         | 1       | 3                   | N/A                     | 1        | U           | 1                      | 1                | U      |
| Chisamore, 2016                           | HDD                      | 1         | 1       | 3                   | N/A                     | 0        | U           | 0                      | 1                | U      |
| Patrick, 2015                             | Billing                  | 1         | 1       | 3                   | N/A                     | 0        | U           | 0                      | 1                | U      |
| Alsalem, 2019                             | HDD                      | 1         | 0       | 3                   | N/A                     | 0        | 0           | 0                      | U                | 0      |
| Phillips-Bell, 2019                       | HDD/SURVL                | 1         | 1       | 3                   | N/A                     | 0        | U           | 0                      | 1                | U      |
| Lind, 2019abcdef                          | HD/SURVL                 | 0         | 1       | 1                   | N/A                     | 0        | 1           | 1                      | 0                | 0      |
| Maalouf, 2019ab                           | Billing                  | 1         | 1       | 3                   | N/A                     | 1        | U           | 0                      | 1                | U      |
| Umer, 2018                                | HD/SURVL                 | 1         | 1       | 3                   | N/A                     | 0        | U           | 0                      | 0                | U      |
| <b>Fetal Alcohol Syndrome (FAS)</b>       |                          |           |         |                     |                         |          |             |                        |                  |        |
| Harris, 2003                              | HDD                      | 1         | 1       | 3                   | N/A                     | 0        | U           | 0                      | 1                | U      |
| Allen, 2007                               | SURVL                    | 1         | 1       | 3                   | N/A                     | 1        | U           | 1                      | 0                | U      |
| Egeland, 1998                             | HDD                      | 1         | 1       | 3                   | N/A                     | 0        | U           | 1                      | 1                | U      |
| Welty, 1995                               | HD/SURVL                 | 1         | 1       | 3                   | N/A                     | 0        | 1           | 0                      | 1                | U      |
| Miller, 1995                              | HDD/SURVL                | 1         | 1       | 3                   | N/A                     | 0        | U           | 0                      | 0                | U      |
| Miller, 2002                              | HDD/SURVL                | 1         | 1       | 3                   | N/A                     | 0        | U           | 0                      | 0                | U      |
| Fox, 2003                                 | SURVL                    | 1         | 1       | 3                   | N/A                     | 0        | U           | 0                      | 0                | U      |
| <b>Child maltreatment (CM)</b>            |                          |           |         |                     |                         |          |             |                        |                  |        |
| McKenzie, 2012                            | HDD                      | 1         | 1       | 3                   | NR                      | 0        | 1           | 1                      | 1                | 1      |
| Risen, 2015                               | CPD/HDD                  | 0         | 1       | 5                   | TF, FALLS, ACCI         | 0        | U           | 0                      | 1                | 0      |
| Gessner, 2004                             | SURVL/TR/HDD             | 1         | 0       | 4                   | NR                      | 0        | U           | 0                      | 0/1 <sup>g</sup> | U      |
| Gumbs, 2013                               | Billing                  | 0         | 1       | 4                   | NR                      | 0        | 1           | 1                      | 1                | 1      |
| Schnitzer, 2004                           | HDD/ED                   | 1         | 1       | 5                   | NR                      | 0        | U           | 1                      | 1                | U      |
| Parrish, 2013a                            | HDD/SURVL                | 1         | 1       | 3                   | NR                      | 0        | U           | 1                      | 0                | 1      |
| Berger, 2013                              | HDD                      | 1         | 1       | 4                   | NR                      | 0        | U           | 0                      | 1                | U      |
| Paroskie, 2014                            | Billing                  | 1         | 1       | 1                   | NR                      | 0        | U           | 0                      | 1                | U      |
| Krawiec, 2019                             | Billing                  | 1         | 1       | 3                   | NR                      | 0        | U           | 0                      | 1                | 0      |
| Karatekin, 2018                           | HD                       | 1         | 1       | 3                   | NR                      | 0        | 1           | 1                      | 1                | 1      |
| O'Donnell, 2010                           | HDD                      | 1         | 1       | 2                   | NR                      | 0        | U           | 1                      | 1                | U      |
| O'Donnell, 2012                           | HDD                      | 1         | 1       | 3                   | NR                      | 0        | U           | 1/C                    | 1                | U      |
| Garza, 2019a                              | SURVL/TR                 | 1         | 1       | 4                   | Age                     | 0        | U           | 0                      | 0                | U      |
| Garza, 2019b                              | SURVL/TR                 | 1         | 1       | 4                   | Age                     | 0        | U           | 0                      | 0                | U      |
| Raghavan, 2015                            | Billing                  | 1         | 1       | 3                   | ACCI/Birth              | 0        | U           | 0                      | 1                | 0      |
| Schnitzer, 2011                           | HDD/ED                   | 1         | 1       | 3                   | PA, TF, BD, BIRTH       | 0        | U           | 1/Rand                 | 1                | U      |
| Wu, 2015                                  | HD                       | 1         | 1       | 3                   | ACCI                    | 0        | 1           | 0                      | 1                | 1      |
| Hoof, 2015                                | HDD/TR                   | 1         | 0       | 2                   | ACCI                    | 0        | U           | 0                      | 0/1 <sup>g</sup> | 0      |
| Somji, 2011                               | HDD                      | 1         | 1       | 4                   | ACCI                    | 0        | U           | 0                      | 0                | U      |
| Gonzalez-Izquierdo, 2015                  | HD                       | 1         | 1       | 3                   | NR                      | 0        | U           | 0                      | 1                | U      |
| Tingberg, 2010                            | HD                       | 1         | 0       | 3                   | ACCI                    | 0        |             | 0                      | 1                | 0      |
| Evasovich, 1998                           | HDD                      | 1         | 1       | 2                   | ACCI                    | 0        | U           | 0                      | 1                | U      |
| Payne, 2016                               | Billing/TR               | 1         | 1       | 4                   | NR                      | 0        | U           | 0                      | 0/1 <sup>g</sup> | U      |
| Hoof, 2013                                | SURVL/TR                 | 0         | 1       | 3                   | Birth/ACCI              | 0        | 1           | 0                      | 0                | U      |
| Myhre, 2007                               | HDD                      | 1         | 0       | 3                   | ACC                     | 0        | U           | 0                      | 1                | U      |
| Hansoti, 2008                             | RE-Code                  | 1         | 0       | 5                   | NA                      | 0        | U           | 0                      | 0                | U      |
| Hui, 2008                                 | HDD                      | 1         | 0       | 3                   | BD/TF                   | 0        | U           | 0                      | 1                | U      |
| Capra, 2013                               | HDD/SURVL                | 1         | 0       | 3                   | Age, BD, TF, FALL       | 0        | U           | 0                      | 1                | U      |
| Baldwin, 2010                             | SURVL/TR                 | 0         | 1       | 2                   | Age, BD, ACCI           | 0        | U           | 0                      | 0                | U      |
| Sharkey, 2018                             | HDD/TR                   | 1         | 1       | 3                   | BD, ACCI                | 0        | U           | 0                      | 1/0 <sup>g</sup> | U      |
| Strait, 1995                              | HDD                      | 1         | 1       | 3                   | ACCI, BIRTH             | 0        | U           | 0                      | 1                | U      |
| Ryznar, 2015                              | HDD/RE-Code              | 1         | 1       | 2                   | BD/BIRTH/               | 0        | U           | 0                      | 0                | U      |
| Lavin, 2018                               | HD                       | 1         | 1       | 1                   | ACCI, INJU, Birth       | 0        | 1           | 0                      | 1                | 0      |
| Högberg, 2019                             | HDD                      | 1         | 1       | 1                   | NR                      | 0        | 1           | 0                      | 1                | 0      |
| Lane, 2002                                | HDD                      | 1         | 0       | 3                   | Birth/ACCI/BD           | 1        | U           | 0                      | 1                | U      |
| Wood, 2009                                | HD                       | 1         | 1       | 1                   | TF, BIRTH, BD           | 0        | U           | 0                      | 1                | U      |
| Anderst, 2008                             | HDD                      | 1         | 1       | 1                   | Age, TP, BD, PA         | 0        | U           | 0                      | 1                | U      |
| Rangel, 2009                              | TR                       | 1         | 1       | 3                   | FALL, ACCI              | 0        | U           | 0                      | 0                | U      |
| Lasekey, 2013                             | TR                       | 1         | 0       | 1                   | Birth/ACCI/BD           | 0        | U           | 0                      | 0                | U      |

**Table S7. Individual study QUADAS-2 scores by outcome<sup>a</sup> (continued)**

| Source                                 | EHR setting <sup>b</sup> | 1. Select | 2. Test | 3. Ref <sup>d</sup> | Methods                 |          |             | Applicability          |         |        |
|----------------------------------------|--------------------------|-----------|---------|---------------------|-------------------------|----------|-------------|------------------------|---------|--------|
|                                        |                          |           |         |                     | 3. Ref ex. <sup>e</sup> | 4. Blind | 5. Flow & T | 6. Select <sup>c</sup> | 7. Test | 8. Ref |
| <b>Child maltreatment (CM)</b>         |                          |           |         |                     |                         |          |             |                        |         |        |
| Kim, 2017                              | TR                       | 1         | 1       | 2                   | N/A                     | 0        | U           | 0                      | 0       | U      |
| Lyons, 2016                            | TR/HD                    | 0         | 1       | 2                   | N/A                     | 0        | 1           | 0                      | U       | 0      |
| Ettaro, 2004                           | HDD                      | 1         | 1       | 3                   | Age, SI, TF             | 0        | U           | 0                      | 1       | U      |
| Tzioumi, 1998                          | HD                       | 1         | 0       | 1                   | ACCI, OTHER             | 0        | U           | 0                      | 1       | U      |
| Thyen, 1997                            | HD                       | 1         | 0       | 2                   | ACCI                    | 0        | U           | 1/Broad                | 1       | U      |
| Ricci, 2003                            | HDD                      | 1         | 1       | 3                   | N/A                     | 0        | 0           | 0                      | 1       | U      |
| Keenan, 2003                           | HDD/SURVL                | 0         | 1       | 5                   | N/A                     | 0        | U           | 0                      | 1       | U      |
| Durand, 2019                           | TR                       | 0         | 1       | 3                   | ACCI                    | 0        | 1           | C                      | 1       | 0      |
| Parrish, 2013b                         | HDD/SURVL                | 1         | 1       | 3                   | N/A                     | 0        | U           | 1                      | 0       | 1      |
| <b>Intimate Partner Violence (IPV)</b> |                          |           |         |                     |                         |          |             |                        |         |        |
| Kivela, 2019                           | HDD                      | 1         | 1       | 3                   | N/A                     | 0        | U           | 0                      | 1       | U      |
| Fanslow, 1998                          | RE-Code                  | 1         | 1       | 3                   | N/A                     | 0        | U           | 1/Rand                 | 0       | U      |
| Saltzman, 2005                         | HDD/SURVL                | 1         | 0       | 3                   | N/A                     | 0        | U           | 1                      | 1       | U      |
| Brown, 2002                            | SURVL                    | 1         | 1       | 3                   | N/A                     | 0        | U           | 0                      | U       | U      |
| Yau, 2013                              | HD/SURVL                 | 1         | 0       | 3                   | N/A                     | 0        | 1           | 1/Broad                | 0       | 1      |
| Lipsky, 2008                           | HDD                      | 1         | 1       | 3                   | N/A                     | 0        | U           | 0                      | 1       | U      |
| Biroscak, 2006                         | SURVL                    | 1         | 1       | 3                   | N/A                     | 0        | U           | 0                      | 0       | U      |
| Ranney, 2011                           | Billing                  | 1         | 1       | 3                   | N/A                     | 1        | U           | 1/C                    | 1       | U      |
| Kernic, 2000                           | HDD                      | 1         | 0       | 1                   | N/A                     | 0        | U           | 0                      | 1       | U      |
| Bonomi, 2009                           | HDD                      | 1         | 0       | 3                   | N/A                     | 0        | 0           | 1                      | 1       | 1      |
| Muelleman, 1996                        | RE-Code                  | 1         | 1       | 3                   | N/A                     | 0        | 0           | 1/C                    | 0       | 1      |
| Wong, 2016                             | HDD                      | 1         | 0       | 3                   | N/A                     | 0        | 1           | 0                      | 1       | 0      |
| Muelleman, 1998                        | HD                       | 1         | 1       | 3                   | N/A                     | 0        | U           | 0                      | 1       | U      |
| Schafer, 2008                          | HDD/ED                   | 1         | 1       | 2                   | N/A                     | 0        | U           | 1                      | 1       | U      |
| Goldberg, 2000                         | Billing                  | 1         | 0       | 3                   | N/A                     | 0        | U           | 0                      | 1       | U      |
| Cohen, 2019                            | HDD                      | 1         | 1       | 3                   | N/A                     | 0        | U           | 0                      | 1       | U      |
| Clark, 2014                            | HDD                      | 0         | 0       | 2                   | N/A                     | 0        | U           | 0                      | 1       | U      |
| Arosarena, 2009                        | Billing                  | 1         | 1       | 3                   | N/A                     | 0        | U           | 0                      | 1       | U      |

<sup>a</sup> For all quality domains, except for "3.Ref": 1=low bias/higher quality; 0=high bias/lower quality; U=unknown bias.

<sup>b</sup> Type of electronic health records used to identify cases: HDD=hospital discharge database, HD=Hospital database, Billing=Billing records, SURVL=Surveillance database, TR=Trauma registry, RE-Code=Manual recoding of medical records into ICD codes.

<sup>c</sup> Where applicable: C=Consecutive sample; Rand=Random sample; Broad=Broader sample (i.e. not only positively coded cases).

<sup>d</sup> Quality ratings correspond to the level of certainty that the reference standard is a true measure of CM, NAS, FAS, or IPV.

<sup>e</sup> Indicates the type of exclusions made to distinguish non-abuse from abuse before applying reference standard (only applicable to injury related indicators consistent with CM): Age=Specific age criteria; ACCI=Multiple accidental causes, Birth= Birth injuries, BD= Metabolic bone diseases; FALL=Fall accidents, TP=Transport injuries; OTHER= Other medical conditions such as childhood cancer and congenital heart diseases; PA=Children with Previous Abuse recordings.

<sup>f</sup> Overall risk of bias judgement: High=High risk of bias, Mod=Moderate risk of bias, Low=Low risk of bias.

<sup>g</sup> Ratings dependent on indicator studied, as study contributed with estimates for more than one indicator.

**Abbreviations:** Blind=Blinded reference standard; Flow & T=Flow and timing; N/A=Not applicable; Ref=Reference standard; Ref ex=Reference standard exclusions; Select=Patient selection.

**Table S8. Codes used for identifying CM, NAS, FAS, or IPV by individual study, indicator and care setting**

| Source                                             | Indicator                 | Setting           | System <sup>a</sup> | Codes <sup>b</sup>                                                                                                                                                                                                                                                                                                                                                                 |
|----------------------------------------------------|---------------------------|-------------------|---------------------|------------------------------------------------------------------------------------------------------------------------------------------------------------------------------------------------------------------------------------------------------------------------------------------------------------------------------------------------------------------------------------|
| <b>Outcome: Neonatal Abstinence Syndrome (NAS)</b> |                           |                   |                     |                                                                                                                                                                                                                                                                                                                                                                                    |
| Chisamore, 2016                                    | NAS                       | Inpatient         | ICD-10              | P96.1                                                                                                                                                                                                                                                                                                                                                                              |
| Lind, 2019a                                        | NAS                       | Inpatient & SURVL | ICD-10              | P96.1                                                                                                                                                                                                                                                                                                                                                                              |
| Lind, 2019c                                        | NAS                       | Inpatient & SURVL | ICD-10              | P96.1                                                                                                                                                                                                                                                                                                                                                                              |
| Lind, 2019f                                        | NAS                       | Inpatient & SURVL | ICD-10              | P96.1                                                                                                                                                                                                                                                                                                                                                                              |
| Maalouf, 2019b                                     | NAS                       | Inpatient         | ICD-10              | P96.1                                                                                                                                                                                                                                                                                                                                                                              |
| Umer, 2019                                         | NAS                       | Inpatient & SURVL | ICD-10              | P04.1–P04.4, P04.8, P04.9, P96.1.27                                                                                                                                                                                                                                                                                                                                                |
| Yam, 2019                                          | NAS                       | Inpatient & SURVL | ICD-10              | P96.1                                                                                                                                                                                                                                                                                                                                                                              |
| Alsalem, 2019                                      | NAS                       | Inpatient         | ICD-9               | 779.5 or 760.72                                                                                                                                                                                                                                                                                                                                                                    |
| Huybrechts, 2017                                   | NAS                       | Inpatient         | ICD-9               | 779.5x                                                                                                                                                                                                                                                                                                                                                                             |
| Lind, 2015                                         | NAS                       | Inpatient         | ICD-9               | 779.5, 760.72                                                                                                                                                                                                                                                                                                                                                                      |
| Lind, 2019b                                        | NAS                       | Inpatient & SURVL | ICD-9               | 779.50                                                                                                                                                                                                                                                                                                                                                                             |
| Lind, 2019d                                        | NAS                       | Inpatient & SURVL | ICD-9               | 779.50                                                                                                                                                                                                                                                                                                                                                                             |
| Lind, 2019e                                        | NAS                       | Inpatient & SURVL | ICD-9               | 779.50                                                                                                                                                                                                                                                                                                                                                                             |
| Maalouf, 2019a                                     | NAS                       | Inpatient         | ICD-9               | 779.5                                                                                                                                                                                                                                                                                                                                                                              |
| Patrick, 2015                                      | NAS                       | Inpatient         | ICD-9               | 779.5                                                                                                                                                                                                                                                                                                                                                                              |
| Phillips-Bell, 2019                                | NAS                       | Inpatient         | ICD-9               | 779.5                                                                                                                                                                                                                                                                                                                                                                              |
| Lind, 2019a                                        | Newborn affected by drugs | Inpatient & SURVL | ICD-10              | P04.49                                                                                                                                                                                                                                                                                                                                                                             |
| Lind, 2019b                                        | Newborn affected by drugs | Inpatient & SURVL | ICD-9               | 760.72                                                                                                                                                                                                                                                                                                                                                                             |
| Lind, 2019c                                        | Newborn affected by drugs | Inpatient & SURVL | ICD-10              | P04.49                                                                                                                                                                                                                                                                                                                                                                             |
| Lind, 2019d                                        | Newborn affected by drugs | Inpatient & SURVL | ICD-9               | 760.72                                                                                                                                                                                                                                                                                                                                                                             |
| Lind, 2019e                                        | Newborn affected by drugs | Inpatient & SURVL | ICD-10              | P04.49                                                                                                                                                                                                                                                                                                                                                                             |
| Lind, 2019f                                        | Newborn affected by drugs | Inpatient & SURVL | ICD-9               | 760.72                                                                                                                                                                                                                                                                                                                                                                             |
| Phillips-Bell, 2019                                | Newborn affected by drugs | Inpatient         | ICD-9               | 760.72                                                                                                                                                                                                                                                                                                                                                                             |
| <b>Outcome: Fetal Alcohol Syndrome (FAS)</b>       |                           |                   |                     |                                                                                                                                                                                                                                                                                                                                                                                    |
| Harris, 2003                                       | FAS                       | Out/inpatient     | ICD-10/ICD-9        | 760.71, Q86.0, 742.1, Q02, P04.3, 099.3, F10.2, 779.5, P96.1                                                                                                                                                                                                                                                                                                                       |
| Allen, 2007                                        | FAS                       | Inpatient         | ICD-9               | 742.1, 760.76                                                                                                                                                                                                                                                                                                                                                                      |
| Egeland, 1998                                      | FAS                       | Inpatient         | ICD-9               | 760.71, 760.76                                                                                                                                                                                                                                                                                                                                                                     |
| Fox, 2003                                          | FAS                       | Inpatient & SURVL | ICD-9               | 760.71                                                                                                                                                                                                                                                                                                                                                                             |
| Miller, 1995                                       | FAS                       | Inpatient & SURVL | ICD-9               | 760.71                                                                                                                                                                                                                                                                                                                                                                             |
| Miller, 2002                                       | FAS                       | Inpatient & SURVL | ICD-9               | 760.71                                                                                                                                                                                                                                                                                                                                                                             |
| Welty, 1995                                        | FAS                       | Inpatient & ED    | ICD-9               | 760.71                                                                                                                                                                                                                                                                                                                                                                             |
| <b>Outcome: Child maltreatment (CM)</b>            |                           |                   |                     |                                                                                                                                                                                                                                                                                                                                                                                    |
| Garza, 2019b                                       | CM                        | Inpatient         | ICD-10              | T74.12, T76.12, T74.92 or T76.92, Y07, Y09, Z04.72, Z62                                                                                                                                                                                                                                                                                                                            |
| McKenzie, 2012                                     | CM                        | Inpatient         | ICD-10              | T74.0–T74.9, Z04.4, Z04.5, Z61.4, Z61.5, Z61.6, Z62.0, Z62.3, Z62.4, Z62.5, Z62.6, X85–Y09                                                                                                                                                                                                                                                                                         |
| O'Donnell, 2010a                                   | CM                        | Inpatient         | ICD-10              | T74, Y07.1–Y07.3, Y07.8, Y07.9                                                                                                                                                                                                                                                                                                                                                     |
| O'Donnell, 2012                                    | CM                        | Inpatient & ED    | ICD-10              | T74, Y06, Y07                                                                                                                                                                                                                                                                                                                                                                      |
| Garza, 2019a                                       | CM                        | Inpatient         | ICD-9               | 995.50, 995.54, 995.55, 995.59, E960–968.                                                                                                                                                                                                                                                                                                                                          |
| Gessner, 2004                                      | CM                        | Inpatient         | ICD-9               | 995.5, E960–969                                                                                                                                                                                                                                                                                                                                                                    |
| Hooft, 2015                                        | CM                        | Inpatient         | ICD-9               | 967, 995.50, 995.54, 995.55, 995.59, E967, E960–966, 968, 995.55                                                                                                                                                                                                                                                                                                                   |
| Karatekin, 2018                                    | CM                        | Inpatient & ED    | ICD-9               | 995.50–995.59, E967.0–E967.9, E904.0, V71.81                                                                                                                                                                                                                                                                                                                                       |
| Krawiec, 2019                                      | CM                        | Inpatient         | ICD-9 & SNOMED-CT   | 995.54, 995.55, 890, V71.6 /SNOMED CT: 165701015, 253494019, 1210375015, 1218825014, 1777529016, 246704011, 1491714010, 2576622013, 2576624014, 2576625010, 2642513011                                                                                                                                                                                                             |
| Paroskie, 2014                                     | CM                        | Inpatient & ED    | ICD-9               | 995.5, 995.50, 995.54, 995.55, 995.59                                                                                                                                                                                                                                                                                                                                              |
| Raghavan, 2015                                     | CM                        | Inpatient         | ICD-9               | 995.5                                                                                                                                                                                                                                                                                                                                                                              |
| Schnitzer, 2004                                    | CM                        | Inpatient & ED    | ICD-9               | 995.50–995.59, 994.2–994.3, E967.0–E967.9                                                                                                                                                                                                                                                                                                                                          |
| Schnitzer, 2011                                    | CM                        | Inpatient & ED    | ICD-9               | V71.81                                                                                                                                                                                                                                                                                                                                                                             |
| Wu, 2015                                           | CM                        | Inpatient         | ICD-9               | 995.50–995.59                                                                                                                                                                                                                                                                                                                                                                      |
| Durand, 2019                                       | CM                        | Inpatient         | ICD-10              | NR: "Child abuse" in our trauma registry was identified via International Classification of Diseases, Tenth Revision (ICD-10) diagnostic codes (T codes) and ICD-10 external cause codes (Y codes)."                                                                                                                                                                               |
| Berger, 2013                                       | AHT/CM*                   | Inpatient         | ICD-9               | 781.0–781.4, 781.8, 800, 801, 803, 804.1–804.4, 804.6–804.9, 850, 851, 852.0–852.5, 853.0, 853.1, 854.0, 854.1, 925.1, 950.0–950.3, 959.01, 995.55*, E960.0, E967, E968.1, E968.2, E968.8, E968.9, E987, E988.8, E988.9, 995.50, 995.54, 995.59                                                                                                                                    |
| Gumbs, 2013                                        | AHT/CM                    | Inpatient & ED    | ICD-9               | 800.1x–800.4x; 800.6x–800.9x, 803.1x–803.4x; 803.6x–803.9x, 850.0x–850.9x, 851.0x–851.9x, 852.0x–852.5x, 853.0x–853.1x, 854.0x–854.1x, 959.01, 995.55, 995.50, 995.54, 995.59, 361.01–361.9, 362.4x, 379.23, E960.0, E967.x, E968.1, E968.2, E968.8, E968.9, E969                                                                                                                  |
| Parrish, 2013a                                     | AHT/CM                    | Inpatient         | ICD-9               | 781.0 781.4, 781.8, 800, 801, 803, 804.1 804.4, 804.6 804.9, 850, 851, 852.0 852.5, 853.0, 853.1, 854.0, 854.1, 925.1, 950.0 950.3, 959.01; S02, S02.0 S02.1, S02.7 S02.9, S04.0, S06.0 S06.9, S07.1, S07.8 S07.9, S09.7 S09.9, T90.2, T90.5, T90.8 T90.9                                                                                                                          |
| Risen, 2015                                        | AHT/CM                    | Inpatient         | ICD-9               | 995.x                                                                                                                                                                                                                                                                                                                                                                              |
| Garza, 2019b                                       | Assaults                  | Inpatient         | ICD-10              | Y09                                                                                                                                                                                                                                                                                                                                                                                |
| O'Donnell, 2010                                    | Assaults                  | Inpatient         | ICD-10              | X85–Y09                                                                                                                                                                                                                                                                                                                                                                            |
| O'Donnell, 2012                                    | Assaults                  | Inpatient & ED    | ICD-10              | T74, X85–Y09, Z04.4, Z04.5, Y10–Y34                                                                                                                                                                                                                                                                                                                                                |
| Garza, 2019a                                       | Assaults/CM               | Inpatient         | ICD-9               | E960–966, 968–969                                                                                                                                                                                                                                                                                                                                                                  |
| Raghavan, 2015                                     | Assaults                  | Inpatient         | ICD-9               | E961–E966, E968                                                                                                                                                                                                                                                                                                                                                                    |
| Schnitzer, 2011                                    | Assaults                  | Inpatient & ED    | ICD-9               | E968.9                                                                                                                                                                                                                                                                                                                                                                             |
| Gonzalez-Izquierdo, 2014                           | Assaults/CM/adversity     | ED                | ICD-10              | Y04, Y05, X85–Y03, Y08–Y09, Y10–Y34, Z04.0, Z04.5, Z04.8, P96.1, Z60, Z61, Z62, Z63, Z65.3, Z72, Z74, Z76.1, Z76.2, Z81, Z86.5, Z91.6, Z91.8                                                                                                                                                                                                                                       |
| Tingberg, 2010                                     | Assaults/CM/adversity     | ED                | ICD-10              | T741, T742, T743, T748, T749, Y0619' 'Y0699' 'Y0700' 'Y0701' 'Y0702' 'Y0703' 'Y0704' 'Y0708' 'Y0709' 'Y0713' 'Y0718' 'Y0719' 'Y071A' 'Y071C' 'Y0720' 'Y0721' 'Y0723' 'Y0724' 'Y0728' 'Y0729' 'Y0731' 'Y0733' 'Y0734' 'Y0738' 'Y0739' 'Y0780' 'Y0781' 'Y0782' 'Y0783' 'Y0784' 'Y0788' 'Y0789' 'Y078A' 'Y078C' 'Y078X' 'Y0790' 'Y0791' 'Y0792' 'Y0793' 'Y0794' 'Y0798' 'Y0799, Z038K |
| Hogberg, 2018                                      | Assaults/CM/adversity     | Inpatient         | ICD-10/ICD-9        | Z03.8K, Y07.9, 995F, T74.1, Y06, Y07                                                                                                                                                                                                                                                                                                                                               |
| Somji, 2011                                        | Assaults/CM/adversity     | ED                | ICD-10/ICD-9        | ICD-9: 955.5, 995.50–995.59, E960–969, V15.4, V15.41, V61.2, V61.21, V68.2, V71, V71.6, V71.81: ICD-10-CA: T74–T74.9, CM, X85–Y07, Z04–Z04.8, Z61, Z61.6                                                                                                                                                                                                                           |
| Raghavan, 2015                                     | Assaults/CM/adversity     | Inpatient         | ICD-9               | 995.5, 994.2, 994.3, V15.4, V61.21, V71.81, E960.1, E967, E904.0, E968.4, E961–E966, E968, E904.1, 904.2, V71.5                                                                                                                                                                                                                                                                    |
| Schnitzer, 2011                                    | Assaults/CM/adversity     | Inpatient & ED    | ICD-9               | 054.1, 098, 922.4, 614.9, V71.5, V71.81, 362.81, 807.0, 807.1, 811, 852.2, 853, 863.1, E965, E966, E968.2, E968.9, E988, 800, 805, 852, 862, 863.2, 863.3, 865, 952, 262, 521, 692.7, 808, 860, 861, 863.8, 864, 866, 941, 942, 945, 946, 960–979, 994.1, E869.4, E910.2, E910.4, E910.8, E910.9, E960.0, E980, V60, E985                                                          |

**Table S8. Codes used for identifying CM, NAS, FAS, or IPV by individual study, indicator and care setting (continued)**

| Source                                          | Indicator                        | Setting           | System <sup>a</sup> | Codes <sup>b</sup>                                                                                                                                                                                              |
|-------------------------------------------------|----------------------------------|-------------------|---------------------|-----------------------------------------------------------------------------------------------------------------------------------------------------------------------------------------------------------------|
| <b>Outcome: Child maltreatment (CM)</b>         |                                  |                   |                     |                                                                                                                                                                                                                 |
| Evasovich, 1998                                 | Burns                            | Inpatient         | ICD-9               | 995.50, 942.13, 942.23, 942.33                                                                                                                                                                                  |
| Schnitzer, 2011                                 | Burns                            | Inpatient & ED    | ICD-9               | 946                                                                                                                                                                                                             |
| Wu, 2015                                        | Burns                            | Inpatient         | ICD-9               | 920.0–949.9                                                                                                                                                                                                     |
| Hansoti, 2008                                   | Lower limb fractures             | ED                | ICD-10              | NR/Re-coded: "Site of fracture: femur"                                                                                                                                                                          |
| Hui, 2008                                       | Lower limb fractures             | Inpatient         | ICD-10/ICD-9        | NR: "...a diagnosis of femur fracture who presented.... Identified from our institution database (Clinibase; Logibec, Montreal, Canada) using ICD-10/ICD-9 diagnostic codes for the years identified for study" |
| Baldwin, 2010                                   | Lower limb fractures             | Inpatient         | ICD-9               | 820.0-820.9, 821.0-821.9, 995.50-995.59                                                                                                                                                                         |
| Sharkey, 2018                                   | Lower limb fractures             | ED                | ICD-9               | 800–829                                                                                                                                                                                                         |
| Wu, 2015                                        | Lower limb fractures             | Inpatient         | ICD-9               | 805–848                                                                                                                                                                                                         |
| Capra, 2012                                     | Lower limb fractures             | Inpatient         | ICD-10/ICD-9        | NR: "diagnostic codes, for a diagnosis of femur fracture"                                                                                                                                                       |
| Lavin, 2018                                     | Upper limb fractures             | ED                | ICD-9               | 800.0-839.9                                                                                                                                                                                                     |
| Ryznar, 2015                                    | Upper limb fractures             | Inpatient         | ICD-9               | 813, 818, 819, 829                                                                                                                                                                                              |
| Sharkey, 2018                                   | Upper limb fractures             | ED                | ICD-9               | 800–829                                                                                                                                                                                                         |
| Strait, 1995                                    | Upper limb fractures             | Inpatient         | ICD-9               | 812.00-812.99, 959.2, 959.3                                                                                                                                                                                     |
| Wu, 2015                                        | Upper limb fractures             | Inpatient         | ICD-9               | 805–848                                                                                                                                                                                                         |
| Hogberg, 2019                                   | Rib fractures                    | Inpatient & ED    | ICD-10              | S22.3, S22.4                                                                                                                                                                                                    |
| Lavin, 2018                                     | Rib fractures                    | ED                | ICD-9               | 800.0-839.9                                                                                                                                                                                                     |
| Schnitzer, 2011                                 | Rib fractures                    | Inpatient & ED    | ICD-9               | 807.0, 807.1                                                                                                                                                                                                    |
| Sharkey, 2018                                   | Rib fractures                    | ED                | ICD-9               | 800–829                                                                                                                                                                                                         |
| Wu, 2015                                        | Subdural haematoma               | Inpatient         | ICD-9               | 950–959.9                                                                                                                                                                                                       |
| Myhre, 2007                                     | Subdural haematoma, TBI          | Inpatient         | ICD-9               | NR: "Fracture(s) of the skull/base, excluding fracture of the facial bones, traumatic intracranial haemorrhage, intracerebral haemorrhage, cerebral parenchymal injuries."                                      |
| Payne, 2016                                     | Retinal haemorrhage              | Inpatient & ED    | ICD-9               | 362.81                                                                                                                                                                                                          |
| Schnitzer, 2011                                 | Retinal haemorrhage              | Inpatient & ED    | ICD-9               | 362.81                                                                                                                                                                                                          |
| Wu, 2015                                        | Retinal haemorrhage              | Inpatient         | ICD-9               | 950–959.9                                                                                                                                                                                                       |
| Anderst, 2008                                   | Skull fracture                   | ED                | ICD-9               | 800–804, 850–854.19, 920–921.9, 924.9                                                                                                                                                                           |
| Ettaro, 2004                                    | Skull fracture                   | Inpatient         | ICD-9               | 853.00–853.19                                                                                                                                                                                                   |
| Kim, 2017                                       | Skull fracture                   | Inpatient         | ICD-9               | 800–804, 851–854                                                                                                                                                                                                |
| Lane, 2002                                      | Skull fracture                   | Inpatient         | ICD-9               | NR: "Codes for an acute primary skull or long-bone fracture were identified"                                                                                                                                    |
| Lasekey, 2013                                   | Skull fracture                   | Inpatient         | ICD-9               | 800-804.9                                                                                                                                                                                                       |
| Lavin, 2018                                     | Skull fracture                   | ED                | ICD-9               | 800.0-839.9                                                                                                                                                                                                     |
| Lyons, 2015                                     | Skull fracture                   | ED                | ICD-9               | 800.00-800.09                                                                                                                                                                                                   |
| Rangel, 2009                                    | Skull fracture                   | Inpatient         | ICD-9               | 851-854, 800-804                                                                                                                                                                                                |
| Schnitzer, 2011                                 | Skull fracture                   | Inpatient & ED    | ICD-9               | 800                                                                                                                                                                                                             |
| Wood, 2009                                      | Skull fracture                   | Inpatient & ED    | ICD-9               | 800–804                                                                                                                                                                                                         |
| Wu, 2015                                        | Skull fracture                   | Inpatient         | ICD-9               | 800–804.99, 850.0–854.19                                                                                                                                                                                        |
| Ettaro, 2004                                    | Subdural haematoma               | Inpatient         | ICD-9               | 852.00–852.59                                                                                                                                                                                                   |
| Schnitzer, 2011                                 | Subdural haematoma               | Inpatient & ED    | ICD-9               | 852.2                                                                                                                                                                                                           |
| Tzioumi, 1998                                   | Subdural haematoma               | Inpatient         | ICD-9               | NR: "...with the diagnosis of subdural hematoma.."                                                                                                                                                              |
| Wu, 2015                                        | Subdural haematoma               | Inpatient         | ICD-9               | 950–959.9                                                                                                                                                                                                       |
| Ettaro, 2004                                    | TBI                              | Inpatient         | ICD-9               | 852.00–852.59, 853.00–853.19, 800.00–800.99, 801.00–801.99, 803.00–803.99, 804.00–804.99, 854.00–854.19, 959.01, 995.55                                                                                         |
| Hooft, 2015                                     | TBI                              | Inpatient         | ICD-9               | 800–959                                                                                                                                                                                                         |
| Keenan, 2004                                    | TBI                              | Inpatient         | ICD-9               | 800.0-800.4, 800.6-800.9, 801.1-801.9, 803.1-803.4, 803.6-803.9, 804.1-804.9, 850.0-850.9, 851.0-851.9, 852.0-852.5, 853.0-853.1, 854.0-854.1, 959.8-959.9                                                      |
| Parrish, 2013b                                  | TBI                              | Inpatient & SURVL | ICD-9               | 362, 431, 432.9, 800 804, 850-854, E960-E969, E980 E989                                                                                                                                                         |
| Ricci, 2003                                     | TBI                              | Inpatient         | ICD-9               | N348.5, N362.81, N800–01.9, N803–04.9, N850–54.1, N905, N907, N995.5                                                                                                                                            |
| Thyen, 1997                                     | TBI                              | Inpatient         | ICD-9               | NR: "ICD-9 and procedure codes for each of the selected diagnostic groups"; "head trauma (ages 6 months-11 years)"                                                                                              |
| O'Donnell, 2009                                 | Poisonings                       | Inpatient         | ICD-10              | S00-T98                                                                                                                                                                                                         |
| Schnitzer, 2011                                 | Poisonings                       | Inpatient & ED    | ICD-9               | 960–979                                                                                                                                                                                                         |
| Wood, 2012                                      | Poisonings                       | Inpatient & ED    | ICD-9               | 960–979, 980–989, 909.0–909.1, V15.6, V82.5, E850–E858, E860–E869, E950–E952, E962, E969, E980–E982: environmental cause of injury code corresponding to poisoning and overdoses                                |
| Wu, 2015                                        | Poisonings                       | Inpatient         | ICD-9               | 950–959.9                                                                                                                                                                                                       |
| <b>Outcome: Intimate Partner Violence (IPV)</b> |                                  |                   |                     |                                                                                                                                                                                                                 |
| Kivela, 2019                                    | Assaults                         | Inpatient         | ICD-10              | X85–Y09, T74.1                                                                                                                                                                                                  |
| Biroscaj, 2006                                  | Assaults                         | ED                | ICD-9               | 995.80-995.85                                                                                                                                                                                                   |
| Brown, 2005                                     | Assaults                         | ED                | ICD-9               | E960-E968.9, 995.81-995.85                                                                                                                                                                                      |
| Fanslow, 1998                                   | Assaults                         | ED                | ICD-9               | NR: "Nature of injury by ICD chapter: assaults"                                                                                                                                                                 |
| Kernic, 2000                                    | Assaults                         | Inpatient         | ICD-9               | 960–969                                                                                                                                                                                                         |
| Lipsky, 2009                                    | Assaults                         | Inpatient         | ICD-9               | 995.80–995.85, E960-E969                                                                                                                                                                                        |
| Ranney, 2011                                    | Assaults                         | ED                | ICD-9               | 917.0–917.9, 920.0–920.9, 922.0–922.9, 928.3, 955.0–955.6, 956, 960.0–960.1, 966, 965.0–965.4, 967.0–967.9, 968.2, 968.6–968.7, 970, 973, 974, 975, 985.0–985.6, 986                                            |
| Saltzman, 2005                                  | Assaults                         | ED                | ICD-9               | NR: "Unintentional, sexual and physical assault, self-harm", and "legal intervention where injuries are inflicted by law enforcement personnel during official duties"                                          |
| Schafer, 2008                                   | Assaults                         | ED                | ICD-9               | E968.0–E968.9                                                                                                                                                                                                   |
| Yau, 2013                                       | Assaults                         | ED                | ICD-9               | NR: "intentional injuries and all gunshot wounds"                                                                                                                                                               |
| Arosarena, 2009                                 | Facial fracture                  | Out/inpatient     | ICD-9               | 802.0-802.9                                                                                                                                                                                                     |
| Kernic, 2000                                    | Facial fracture                  | Inpatient         | ICD-9               | 850–854                                                                                                                                                                                                         |
| Muelleman, 1996                                 | Facial fracture                  | ED                | ICD-9/AIS           | 251002, 251202, 251800 (re-coded to abbreviated injury scale)                                                                                                                                                   |
| Clark, 2014                                     | Facial fracture, Ocular injuries | Out/inpatient     | ICD-9               | NR: "facial and orbital floor fractures"                                                                                                                                                                        |
| Muelleman, 1998                                 | IPV                              | ED                | ICD-9               | 995.81                                                                                                                                                                                                          |
| Schafer, 2008                                   | IPV                              | Inpatient & ED    | ICD-9               | E967.3, 995.81, 995.80                                                                                                                                                                                          |
| Wong, 2016                                      | IPV                              | ED                | ICD-9               | NR: "abuse", "spousal abuse", "elderly abuse". Authors confirmed using ICD-9 codes upon request.                                                                                                                |
| Arosarena, 2009                                 | Ocular injuries                  | Inpatient & ED    | ICD-9               | 802.0-802.9                                                                                                                                                                                                     |
| Goldberg, 2000                                  | Ocular injuries                  | ED                | ICD-9               | NR: "Seven different codes of skull, facial, and orbital fractures"                                                                                                                                             |
| Cohen, 2019                                     | Ocular injuries                  | ED                | ICD-9/ICD-10        | 871.0-871.9, 921.9, 802.0-802.9; S05.20XA-S05.90XA, S02.2XA-S02.92XB                                                                                                                                            |
| Bonomi, 2009                                    | Upper body contusions            | Out/inpatient     | ICD-9               | NR: "Contusions and abrasions"                                                                                                                                                                                  |
| Kernic, 2000                                    | Upper body contusions            | Inpatient         | ICD-9               | 920-924                                                                                                                                                                                                         |
| Muelleman, 1996                                 | Upper body contusions            | ED                | ICD-9/AIS           | 110202, 110402 (ICD re-coded to abbreviated injury scale)                                                                                                                                                       |

<sup>a</sup> Study specific version/revision of coding systems are provided in Table S6.

<sup>b</sup> Depicts the original study description of codes when specific codes were unable to be obtained from study authors or the original study.

**Abbreviations:** AIS=Abbreviated Injury Scale; NR=Not Reported; ICD-10/ICD-9=International Classification of Diseases, 10th/9th Revision; SURVL=Surveillance.

**Figure S1. Primary diagnoses for neonatal abstinence syndrome: pooled positive predictive values of individual studies**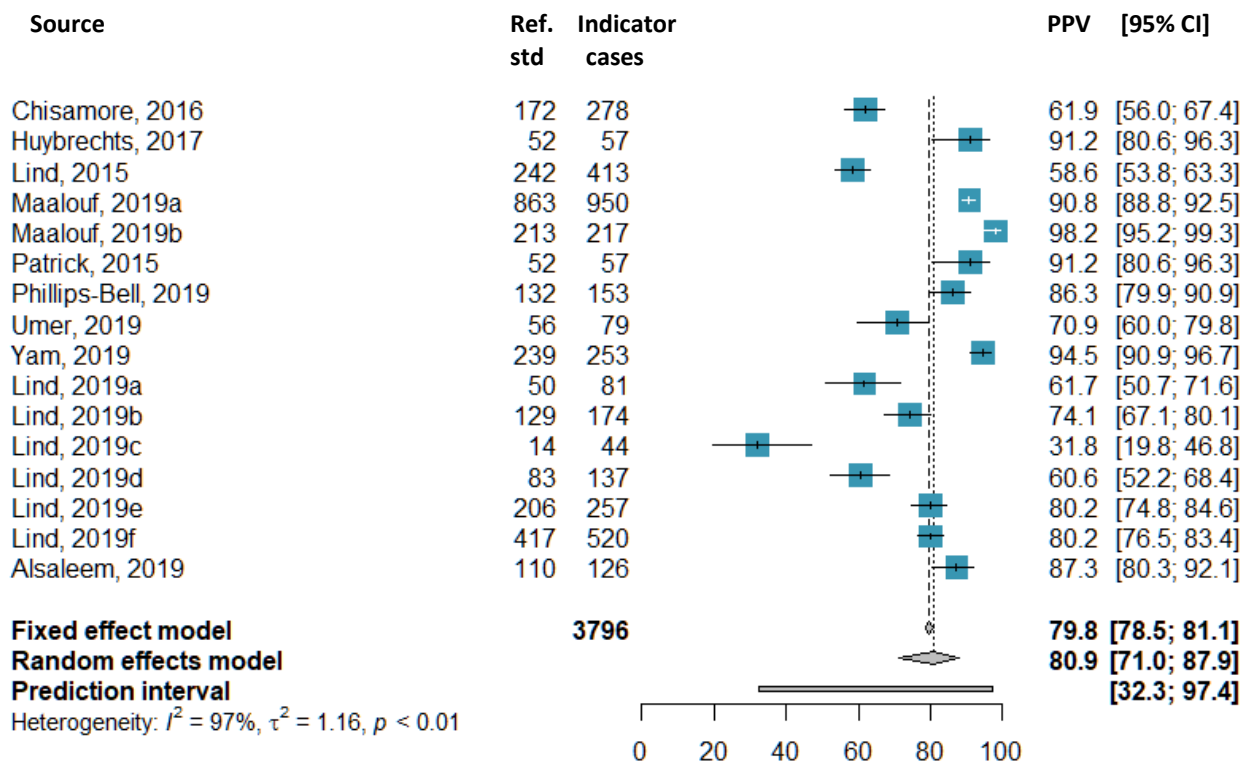**Figure S2. Primary diagnoses for fetal alcohol syndrome: pooled positive predictive values of individual studies**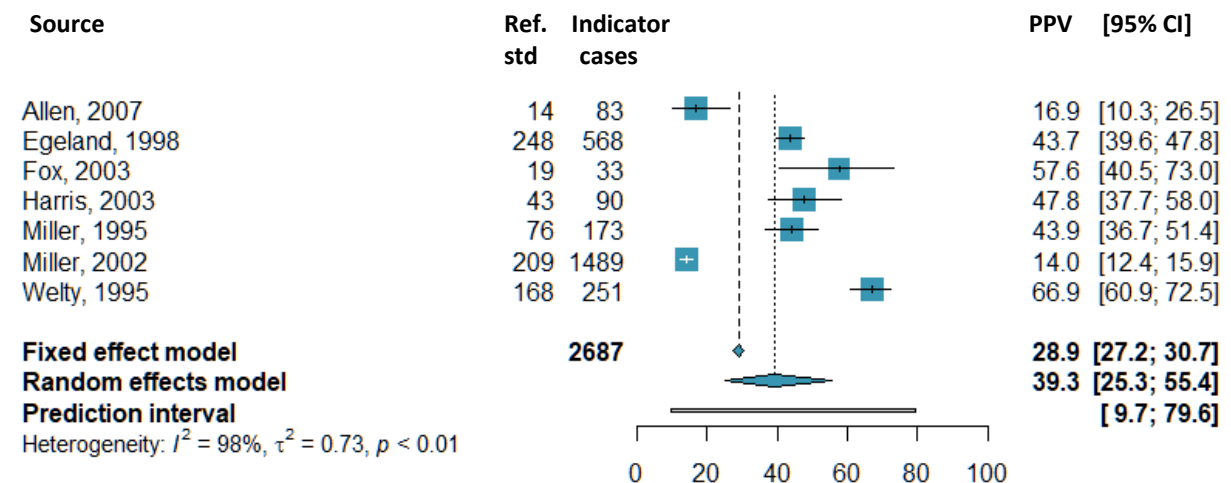

**Figure S3. Primary diagnoses for CM: Pooled positive predictive values of individual studies**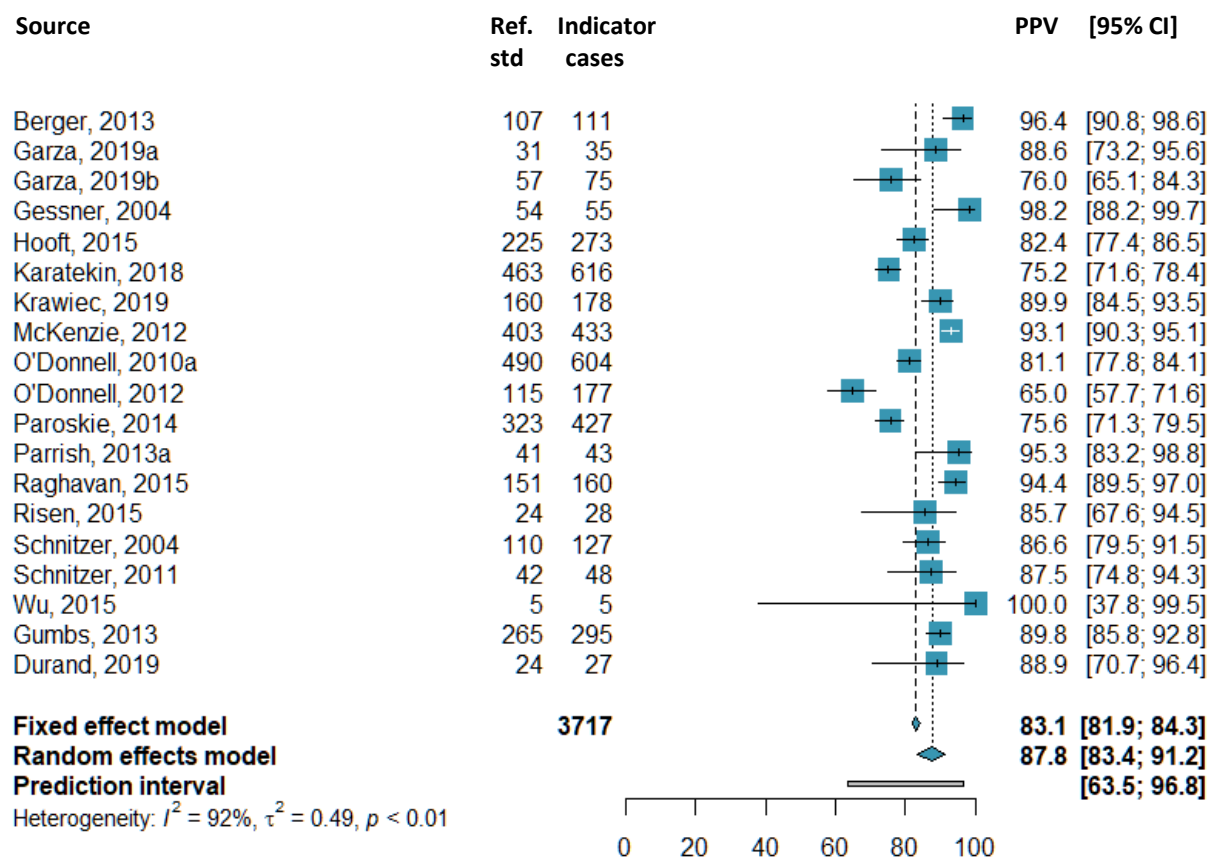**Figure S4. CM and abusive head trauma: Pooled positive predictive values of individual studies**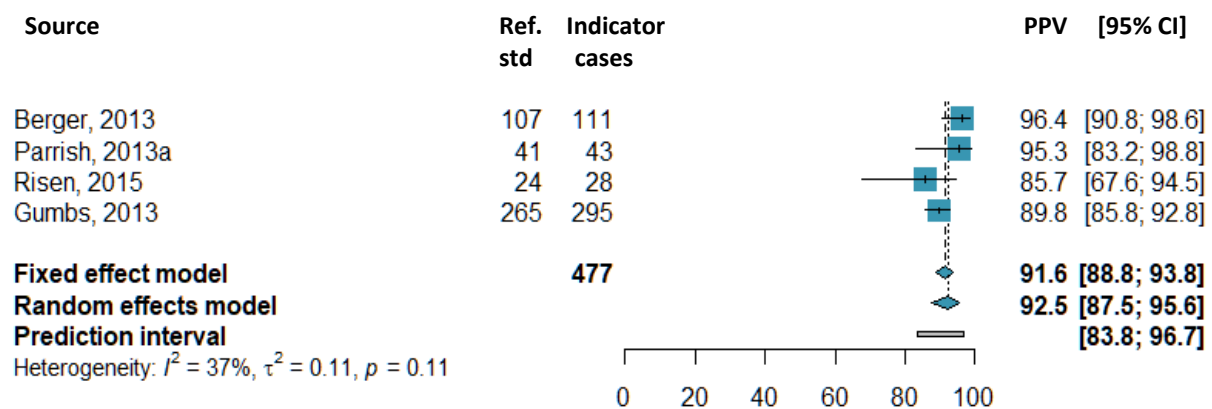



**Figure S5. CM and traumatic brain injury: Pooled positive predictive values of individual studies**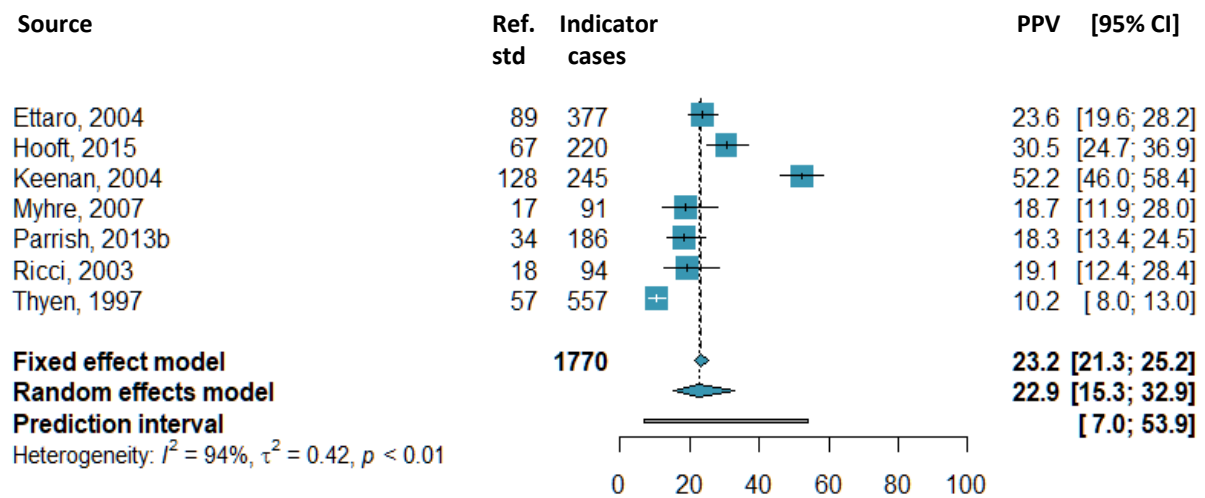**Figure S6. CM and skull fracture: Pooled positive predictive values of individual studies**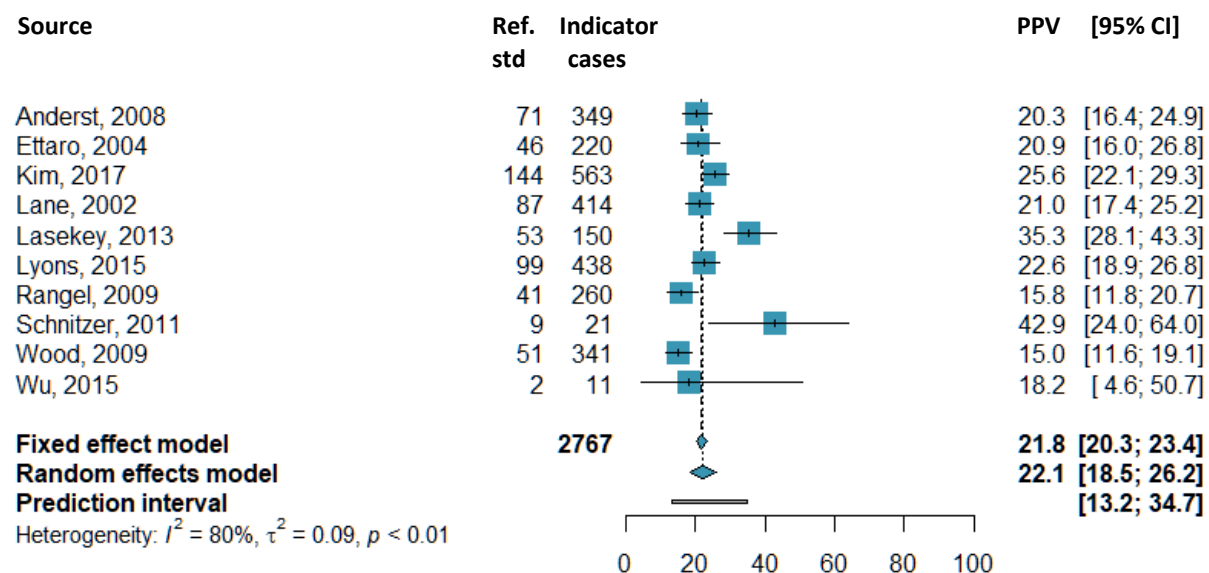

**Figure S7. CM and subdural haematoma: Pooled positive predictive values of individual studies**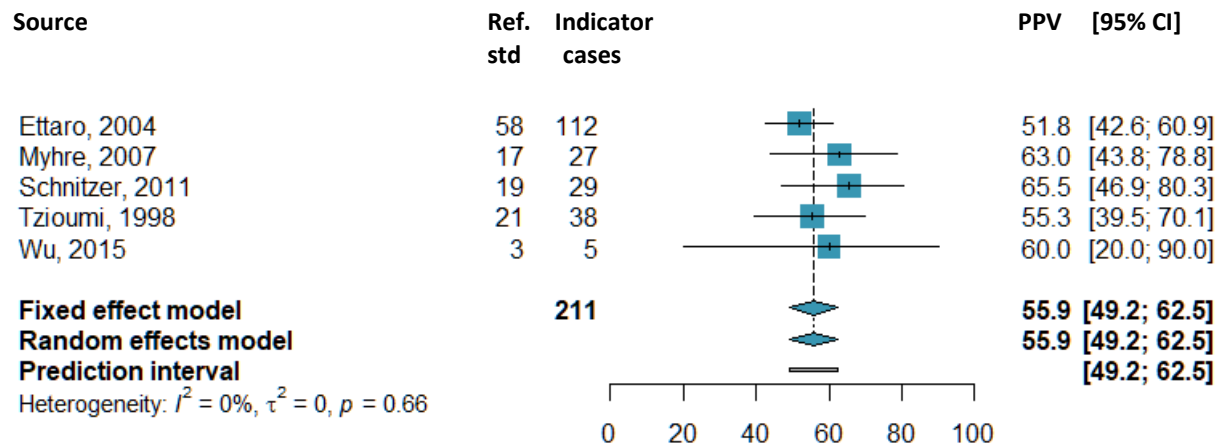**Figure S8. CM and retinal haemorrhages: Pooled positive predictive values of individual studies**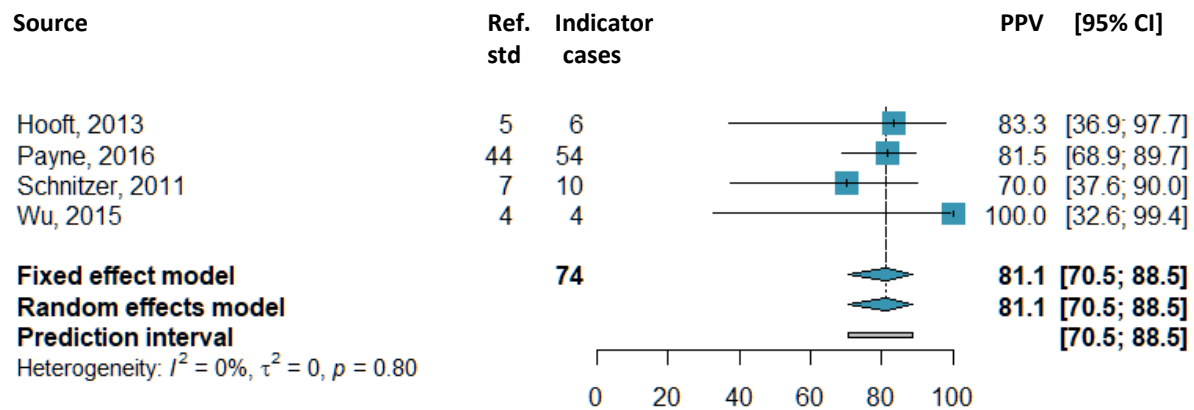**Figure S9. CM and upper limb fractures: Pooled positive predictive values of individual studies**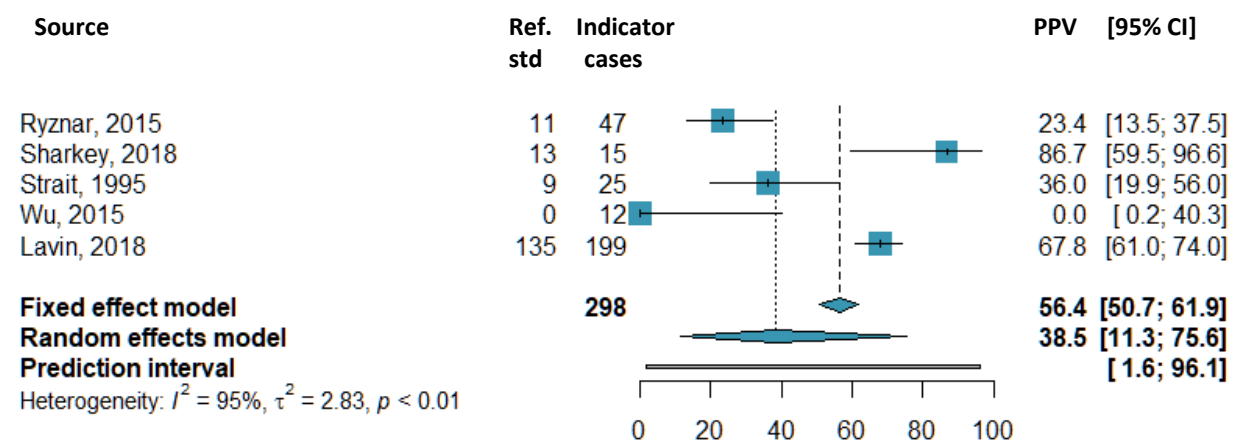

**Figure S10. CM and lower limb fractures: Pooled positive predictive values of individual studies**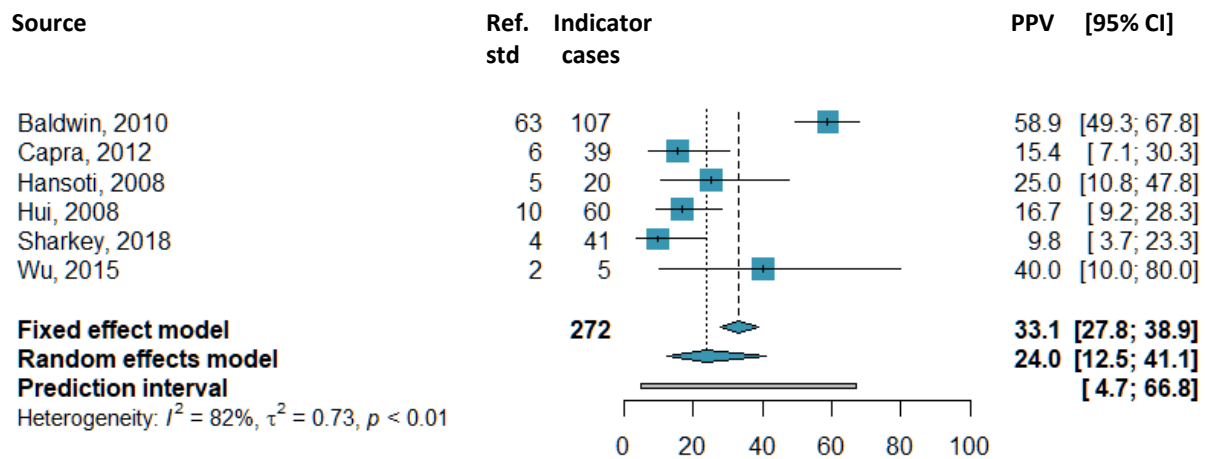**Figure S11. CM and rib fractures: Pooled positive predictive values of individual studies**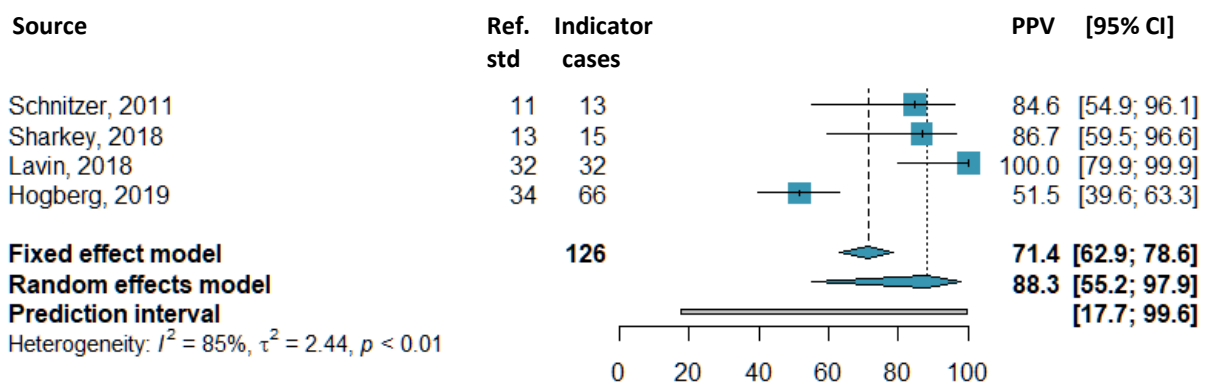**Figure S12. CM and multiple burns: Pooled positive predictive values of individual studies**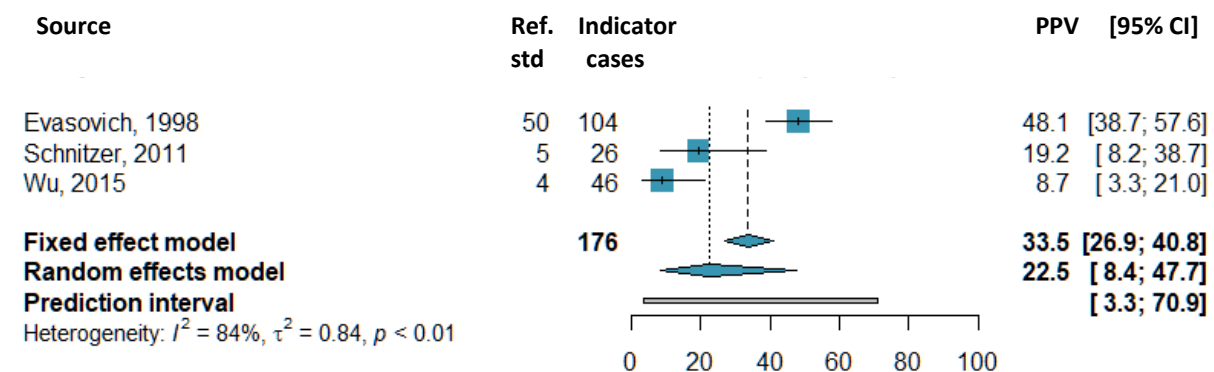

**Figure S13. CM and assaults: Pooled positive predictive values of individual studies**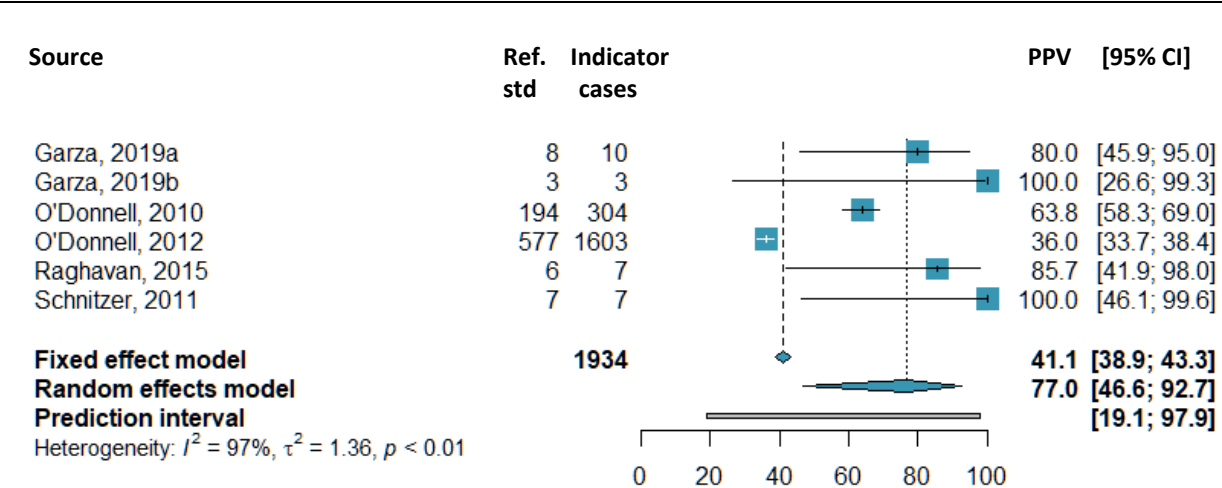**Figure S14. Combination of assaults, adversity, CM and social risk factors for identifying CM: Pooled positive predictive values of individual studies**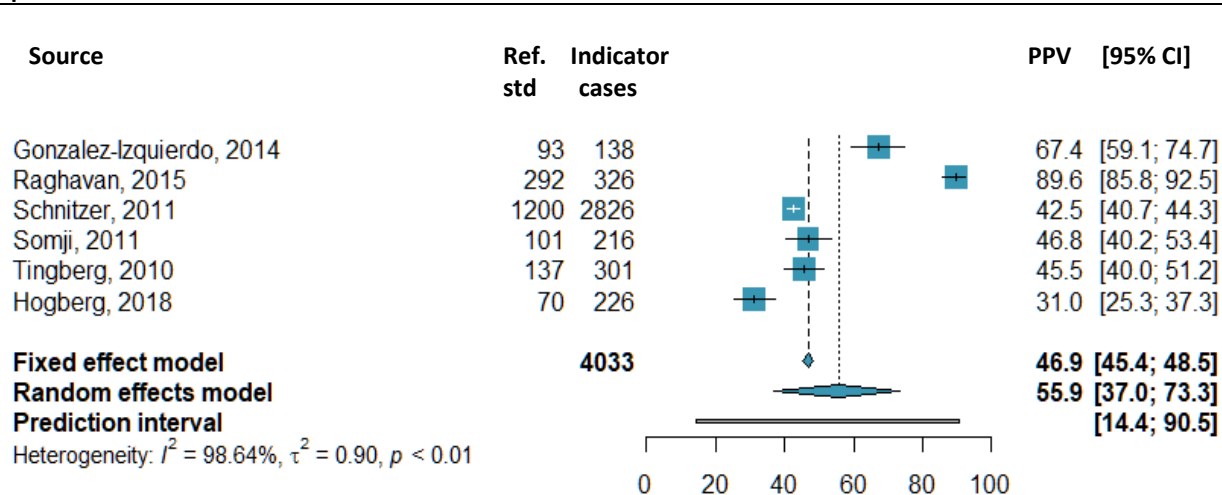**Figure S15. Primary diagnoses for IPV: Pooled positive predictive values of individual studies**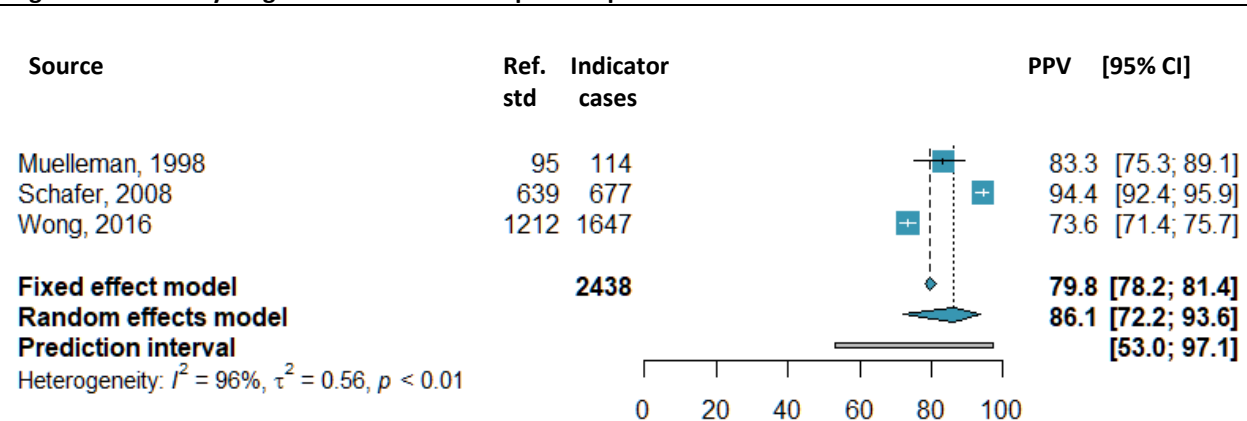

**Figure S16. IPV and ocular injuries (e.g., orbital fractures): Pooled positive predictive values of individual studies**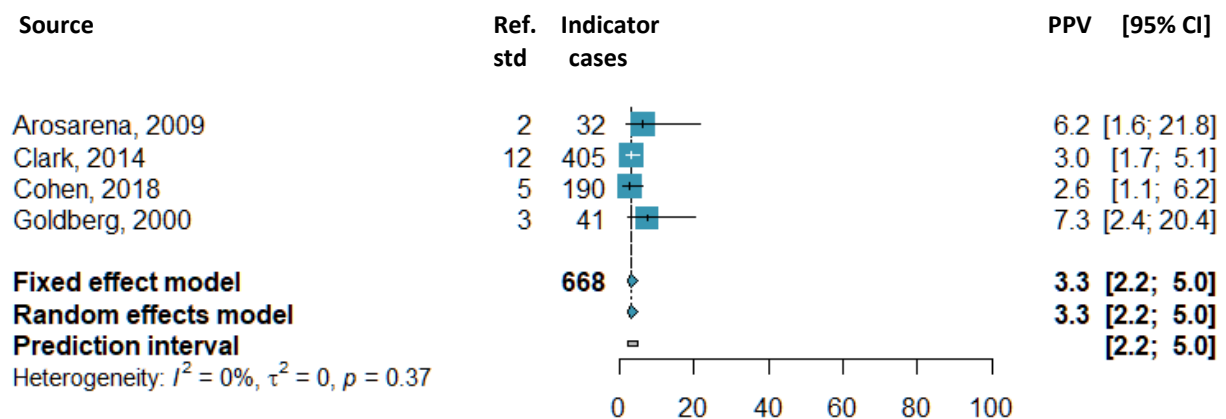**Figure S17. IPV and facial fractures: Pooled positive predictive values of individual studies**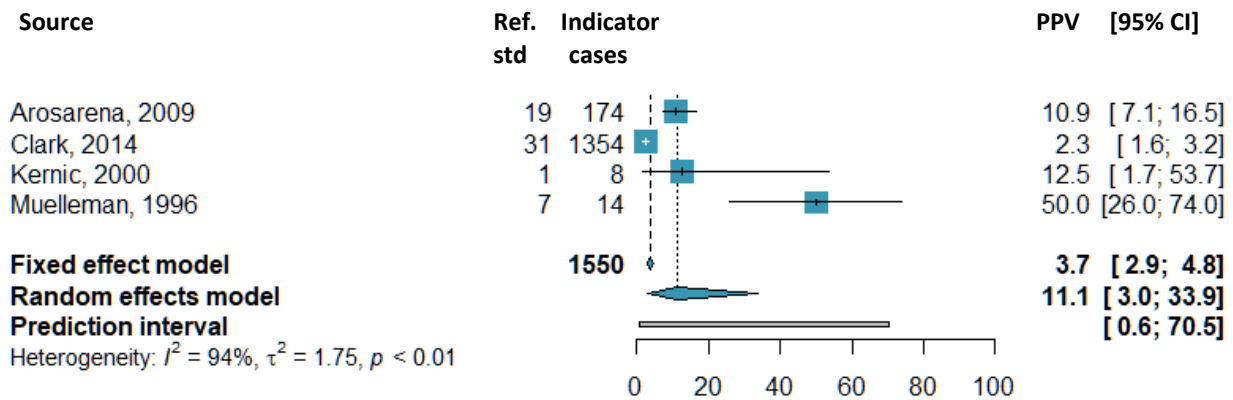**Figure S18. IPV and upper body contusions: Pooled positive predictive values of individual studies**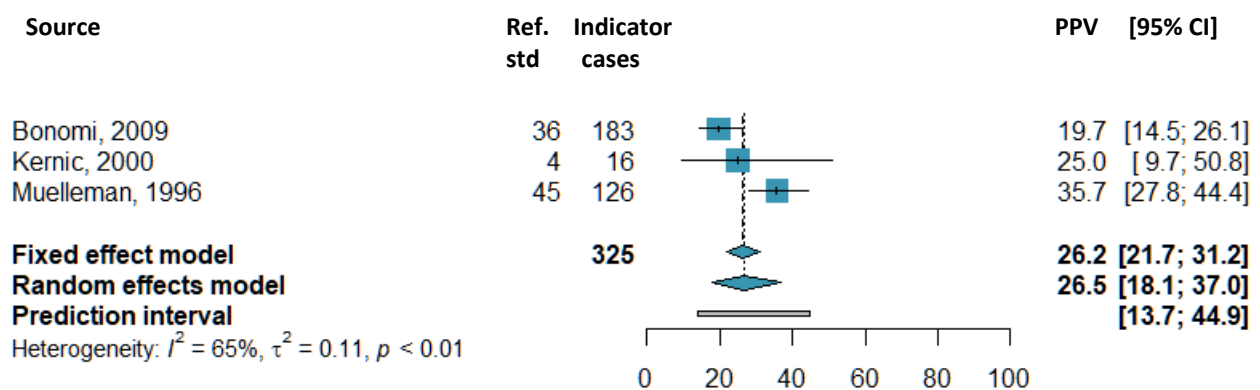

**Figure S19. IPV and assaults: Pooled positive predictive values of individual studies**

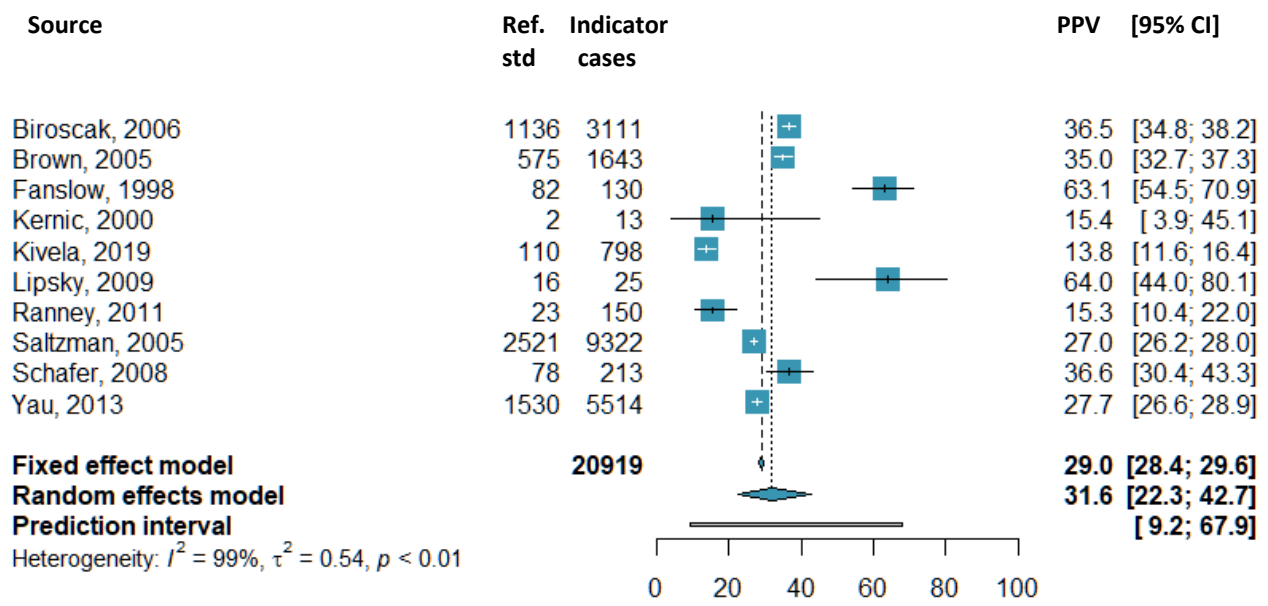

**Table S9. Subgroup analyses for the pooled positive predictive values of neonatal abstinence syndrome, fetal alcohol syndrome and child maltreatment\***

| EHR Indicator & age criteria in years*                                           | Sources | Indicator cases/Ref std. | Pooled PPV (95% CI) | (95% Prediction interval) <sup>††</sup> | <i>I</i> <sup>2</sup> , % | $\tau^2$ | <i>Q</i> | Test for between-study heterogeneity |
|----------------------------------------------------------------------------------|---------|--------------------------|---------------------|-----------------------------------------|---------------------------|----------|----------|--------------------------------------|
| <b>NAS</b>                                                                       |         |                          |                     |                                         |                           |          |          |                                      |
| Overall                                                                          | 16      | 3030/3796                | 80.9 (71.0-87.9)    | (32.3-97.4)                             | 97.4                      | 1.163    | 457.5    |                                      |
| Coding system                                                                    |         |                          |                     |                                         |                           |          |          |                                      |
| ICD-9 (779.5)                                                                    | 9       | 1869/2324                | 82.0 (73.5-88.3)    | (50.5-95.3)                             | 94.3                      | 0.520    | 231.6    | <i>Q</i> =0.1, <i>P</i> =1.00        |
| ICD-10 (P96.1)                                                                   | 7       | 1161/1472                | 78.9 (56.0-91.7)    | (15.6-98.7)                             | 98.1                      | 2.050    | 224.6    |                                      |
| Reference standard                                                               |         |                          |                     |                                         |                           |          |          |                                      |
| Higher threshold only                                                            | 13      | 2870/3603                | 74.8 (65.3-82.4)    | (35.9-94.5)                             | 96.6                      | 0.787    | 331.6    |                                      |
| <b>FAS</b>                                                                       |         |                          |                     |                                         |                           |          |          |                                      |
| Overall                                                                          | 7       | 777/2687                 | 39.3 (25.3-55.4)    | (9.7-79.6)                              | 97.6                      | 0.729    | 445.0    |                                      |
| Outliers                                                                         |         |                          |                     |                                         |                           |          |          |                                      |
| Excluding studies with substantially lower/higher study prevalences <sup>†</sup> | 5       | 554/1115                 | 51.7 (42.8-60.4)    | (32.7-70.2)                             | 85.0                      | 0.130    | 42.0     |                                      |
| Reference standard                                                               |         |                          |                     |                                         |                           |          |          |                                      |
| Higher threshold only                                                            | 7       | 423/2687                 | 19.5 (12.6-28.9)    | (5.7-49.4)                              | 94.7                      | 0.436    | 125.3    |                                      |
| <b>CM ≤18 years</b>                                                              |         |                          |                     |                                         |                           |          |          |                                      |
| Overall                                                                          | 19      | 3090/3717                | 87.8 (83.4-91.3)    | (63.5-96.8)                             | 92.1                      | 0.493    | 196.5    |                                      |
| Setting                                                                          |         |                          |                     |                                         |                           |          |          |                                      |
| ED                                                                               | 6       | 1318/1690                | 80.8 (72.8-86.9)    | (57.7-92.9)                             | 91.8                      | 0.277    | 23.8     | <i>Q</i> =6.6, <i>P</i> =0.01        |
| Inpatient                                                                        | 13      | 1772/2027                | 90.6 (86.2-93.7)    | (72.1-97.3)                             | 84.1                      | 0.402    | 84.4     |                                      |
| Age inclusion                                                                    |         |                          |                     |                                         |                           |          |          |                                      |
| Age <5 <sup>‡</sup>                                                              | 8       | 1181/1386                | 89.4 (83.5-93.3)    | (72.4-96.4)                             | 81.4                      | 0.285    | 25.8     | <i>Q</i> =0.5, <i>P</i> =0.46        |
| Age <19 <sup>‡</sup>                                                             | 11      | 1909/2331                | 86.6 (79.8-91.3)    | (57.4-96.9)                             | 93.6                      | 0.576    | 120.1    |                                      |
| Coding system                                                                    |         |                          |                     |                                         |                           |          |          |                                      |
| ICD-9                                                                            | 14      | 2001/2401                | 89.4 (84.8-92.8)    | (68.9-97.0)                             | 89.0                      | 0.423    | 120.0    | <i>Q</i> =2.2, <i>P</i> =0.14        |
| ICD-10                                                                           | 5       | 1089/1316                | 82.6 (71.4-90.9)    | (52.0-95.4)                             | 92.9                      | 0.4613   | 66.9     |                                      |
| Reference standard                                                               |         |                          |                     |                                         |                           |          |          |                                      |
| Lower threshold                                                                  | 6       | 1099/1380                | 89.4 (78.6-95.1)    | (56.2-98.2)                             | 94.9                      | 0.744    | 39.5     | <i>Q</i> =5.2, <i>P</i> =0.02        |
| Higher threshold                                                                 | 13      | 1533/2337                | 70.8 (55.5-82.6)    | (17.6-96.5)                             | 97.7                      | 1.423    | 312.6    |                                      |

Pooled estimates are based on random-effects meta-analyses by subgroup and outcome, unless otherwise specified.

\*For each indicator, subgroup analyses were only performed and presented when at least four studies were available for each subgroup.

<sup>†</sup>Excluding outlying studies for which individual study estimates suggested extreme underlying prevalences, ranging from 0.3-1.5 cases per 1000 live births across four US large states,<sup>44</sup> to 22.7 cases per 1000 live births in Indian health services.<sup>46</sup>

<sup>‡</sup>Subgroups depicts the oldest possible age of participants included in each group of studies, determined by the studies original age inclusion criteria.

<sup>††</sup>A 95% prediction interval is a measure of between-study variation and approximates where the PPV is to be expected for 95% of similar future studies.

Abbreviations: CM=Child maltreatment; ED=Emergency departments; FAS=Fetal alcohol syndrome; NAS=Neonatal abstinence syndrome; PPV=Positive predictive value; Ref Std.=Reference standard.

**Table S10. Subgroup analyses for the pooled positive predictive values of injury presentations for child maltreatment\***

| EHR Indicator & age criteria in years*                            | Sources | Indicator cases/Ref std. | Pooled PPV (95% CI)           | (95% Prediction interval) <sup>††</sup> | <i>I</i> <sup>2</sup> , % | $\tau^2$ | <i>Q</i> | Test for between-study heterogeneity |
|-------------------------------------------------------------------|---------|--------------------------|-------------------------------|-----------------------------------------|---------------------------|----------|----------|--------------------------------------|
| <b>Traumatic Brain Injury ≤2</b>                                  | 7       | 410/1770                 | 22.9 (15.3-32.9)              | (7.0-53.9)                              | 94.2                      | 0.422    | 170.1    |                                      |
| Excluding natural disaster focused study <sup>†</sup>             | 6       | 282/1525                 | 19.2 (14.3-25.3)              | (9.1-36.0)                              | 84.8                      | 0.161    | 53.5     |                                      |
| <b>Upper limb fractures ≤3</b>                                    | 5       | 249/2379                 | 37.2 (11.2-73.4)              | (1.5-96.0)                              | 98.3                      | 2.925    | 563.7    |                                      |
| <b>Lower limb fractures ≤3</b>                                    | 6       | 90/272                   | 24.0 (12.5-41.1)              | (4.7-66.8)                              | 82                        | 0.731    | 57.4     |                                      |
| Excluding study of multiple expert consensus ratings <sup>‡</sup> | 5       | 86/231                   | 16.4 (11.5-22.8) <sup>¶</sup> | (6.4-69.7)                              | 0.0                       | 0.629    | 4.07     |                                      |
| <b>Rib fractures ≤4</b>                                           | 5       | 90/126                   | 88.3 (55.2-97.9)              | (17.7-99.6)                             | 84.7                      | 2.439    | 36.4     |                                      |
| <b>Skull fractures ≤4</b>                                         | 11      | 619/2872                 | 21.5 (18.2-25.4)              | (12.8-33.9)                             | 78.9                      | 0.090    | 43.4     |                                      |
| Age inclusion <sup>§</sup>                                        |         |                          |                               |                                         |                           |          |          |                                      |
| <1.5 years                                                        | 7       | 463/2182                 | 20.6 (16.5-25.5)              | (11.3-34.7)                             | 38.1                      | 0.112    | 84.5     | <i>Q</i> =0.48, <i>P</i> =1.00       |
| ≤4 years                                                          | 4       | 156/690                  | 22.6 (19.6-25.9)              | (19.6-25.9)                             | 0.0                       | 0.000    | 4.7      |                                      |
| Setting                                                           |         |                          |                               |                                         |                           |          |          |                                      |
| ED                                                                | 4       | 230/1149                 | 20.6 (15.9-26.3)              | (13.0-31.1)                             | 68.1                      | 0.053    | 13.3     | <i>Q</i> =0.1, <i>P</i> =1.00        |
| Inpatient                                                         | 7       | 389/1723                 | 21.8 (17.4-26.9)              | (12.5-35.3)                             | 78.7                      | 0.097    | 27.5     |                                      |

Pooled estimates are based on random-effects meta-analyses by subgroup and outcome, unless otherwise specified.

\*For each indicator, subgroup analyses were only performed and presented when at least four studies were available for each subgroup.

<sup>†</sup>Excluding one outlying study,<sup>94</sup> as the study focused on inflicted traumatic brain injury in children following a natural disaster, where increased resources and higher detection rate was likely, and less representative to other studies.

<sup>‡</sup>Excluding one study,<sup>73</sup> which applied a reference standard using six experts from three different fields who rated each case on the likelihood the fracture, where increased resources and higher detection rate was likely, and less representative to other studies.

<sup>¶</sup>Estimates based on a fixed-effects meta-analysis due to lower between-study heterogeneity (i.e. *I*<sup>2</sup> <50%).

<sup>§</sup>Subgroups are categorised by the oldest possible age of participants included for each study, determined by the studies original age inclusion criteria.

<sup>††</sup>A 95% prediction interval is a measure of between-study variation and approximates where the PPV is to be expected for 95% of similar future studies.

Abbreviations: ED=Emergency departments; PPV=Positive predictive value; Ref Std.=Reference standard.



**Table S11. Meta-regressions: influence of publication year on the pooled PPV by outcome for indicators with at least four studies\***

| Outcome              | Indicator & age in years  | Studies      | Estimate* | 95% LCI | 95% UCI | P-value | I <sup>2</sup> , % | t <sup>2</sup> |
|----------------------|---------------------------|--------------|-----------|---------|---------|---------|--------------------|----------------|
| NAS                  | NAS primary diagnoses     | 16           | 0.070     | -0.301  | 0.44    | 0.713   | 97.0               | 1.146          |
| FAS                  | FAS primary diagnoses     | 7            | -0.123    | -0.248  | 0.003   | 0.055   | 95.9               | 0.459          |
| CM                   | CM primary diagnoses ≤18  | 19           | -0.05     | -0.130  | 0.039   | 0.299   | 91.0               | 0.470          |
|                      | Abusive head trauma ≤4    | 4            | -0.399    | -1.085  | 0.288   | 0.255   | 32.8               | 0.098          |
|                      | Traumatic brain injury ≤2 | 7            | 0.035     | -0.048  | 0.118   | 0.410   | 93.5               | 0.383          |
|                      | Skull fractures ≤4        | 10           | 0.028     | -0.012  | 0.068   | 0.179   | 72.5               | 0.066          |
|                      | Subdural haematoma ≤3†    | 5            | 0.033     | -0.034  | 0.100   | 0.331   | 0.0                | 0.000          |
|                      | Retinal haemorrhages ≤4†  | 4            | 0.110     | -0.190  | 0.411   | 0.472   | 0.0                | 0.000          |
|                      | Upper limb fractures ≤3   | 4            | 0.057     | -0.046  | 0.160   | 0.280   | 86.7               | 0.831          |
|                      | Lower limb fractures ≤3   | 6            | -0.094    | -0.301  | 0.114   | 0.377   | 80.5               | 0.620          |
|                      | Rib fractures ≤4          | 4            | -0.035    | -0.572  | 0.502   | 0.898   | 81.1               | 2.372          |
|                      | Assaults ≤19              | 6            | 0.162     | -0.141  | 0.464   | 0.295   | 92.6               | 0.970          |
|                      | Assaults/CM/adversity ≤19 | 6            | 0.047     | -0.226  | 0.319   | 0.738   | 98.6               | 0.888          |
|                      | IPV                       | Assaults ≤65 | 10        | -0.082  | -0.136  | -0.027  | 0.003              | 98.2           |
| Facial fractures ≤50 |                           | 4            | -0.199    | -0.270  | -0.128  | 0.000   | 28.1               | 0.044          |
| Ocular injuries ≤50  |                           | 4            | -0.066    | -0.144  | 0.012   | 0.098   | 0.0                | 0.000          |

\*Estimates based on random-effects meta-regressions, unless otherwise indicated, aimed at investigating whether the publication year of each study are associated with a change in the overall pooled PPV.

†Estimates based on a fixed-effects meta-analysis due to lower between-study heterogeneity (i.e. I<sup>2</sup> <50%)

Abbreviations: LCI=Lower confidence interval; PPV=Positive predictive value; UCI=Upper confidence interval.

**Figure S20. Prevalence of misclassifications due to coding errors in studies reporting on NAS, CM, and IPV**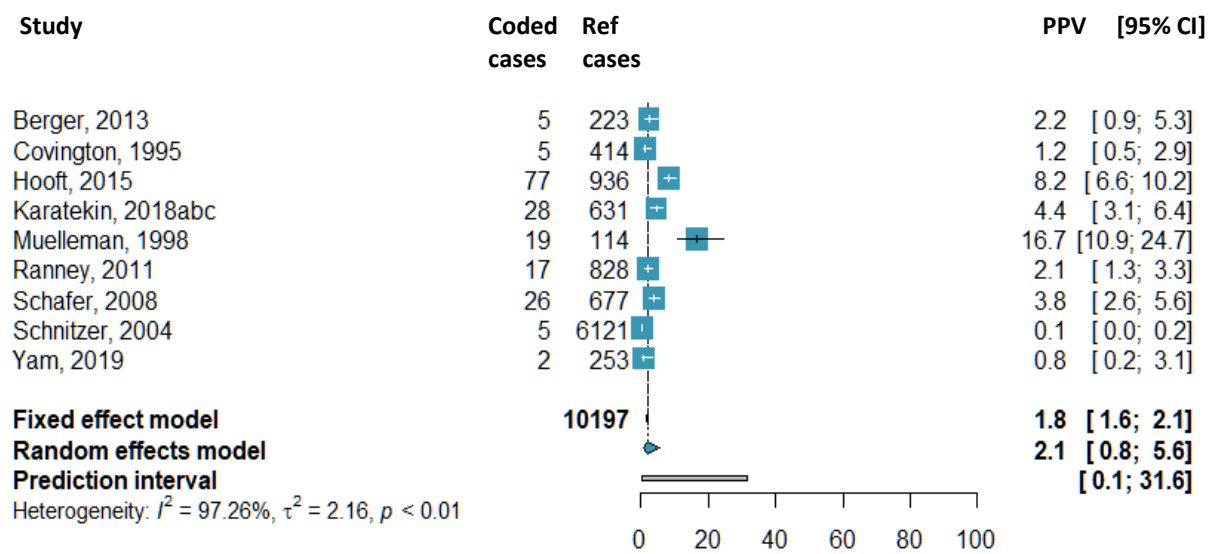**Figure S21. Prevalence of missing perpetrator information in women's medical charts coded as assaults**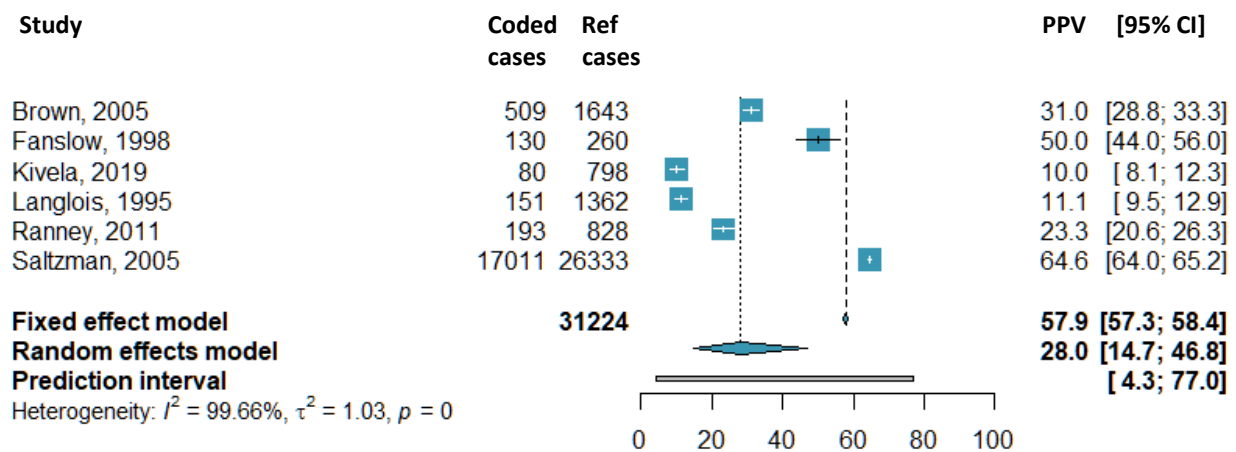

Figure S22. Funnel plot for studies reporting on neonatal abstinence syndrome

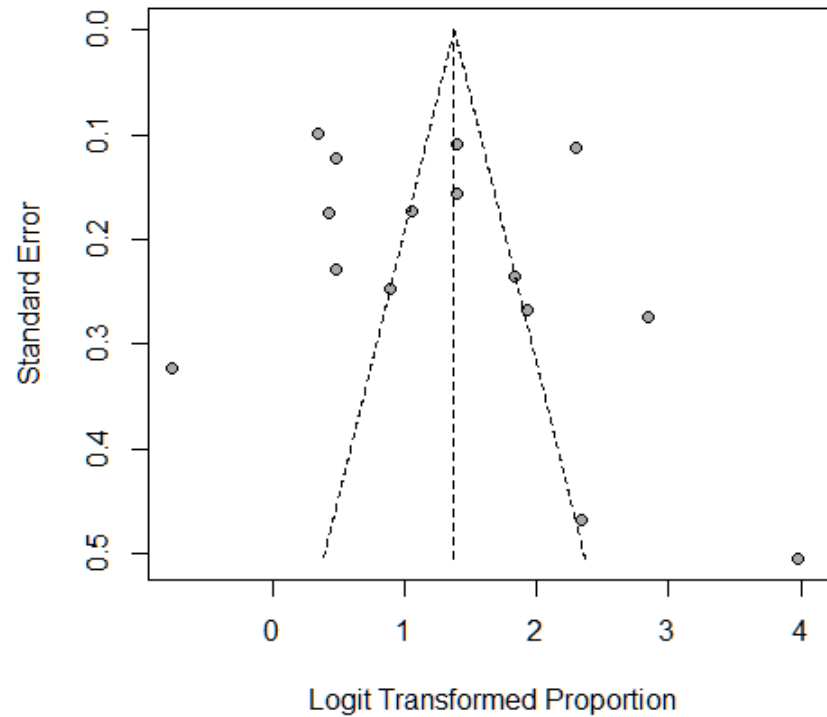

Eggers test= 2.67, slope=0.737,  $p=0.3559$

Begg's and Mazumdar rank correlation test= 29.0,  $p=0.1908$

Figure S23. Funnel plot for studies reporting on primary diagnoses of child maltreatment

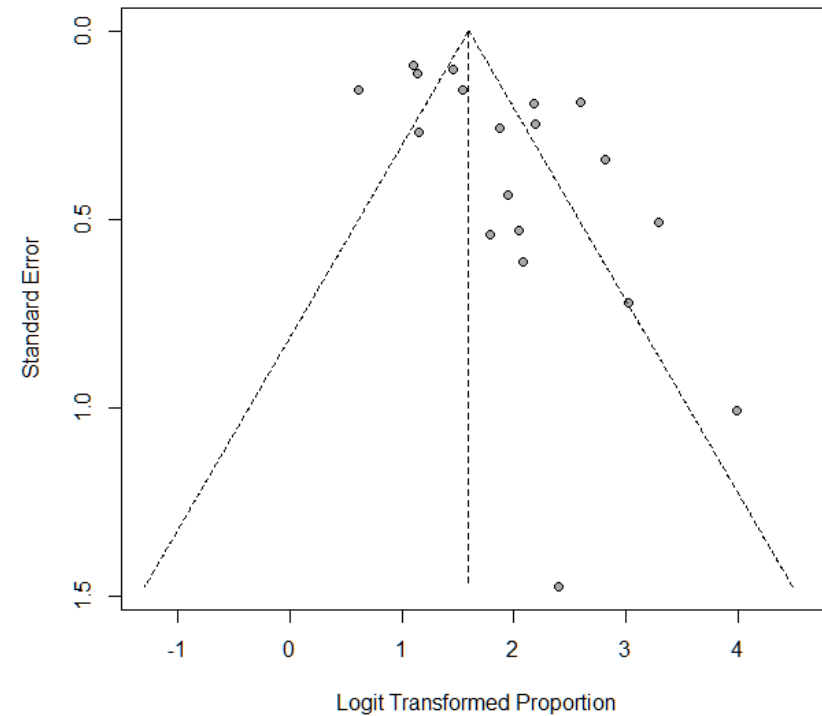

Eggers test= 2.92, slope=0.999,  $p=0.009$

Begg's and Mazumdar rank correlation test= 33.0,  $p=0.248$

**Figure S24. Funnel plot for studies reporting on skull fractures as an indicator of child maltreatment**

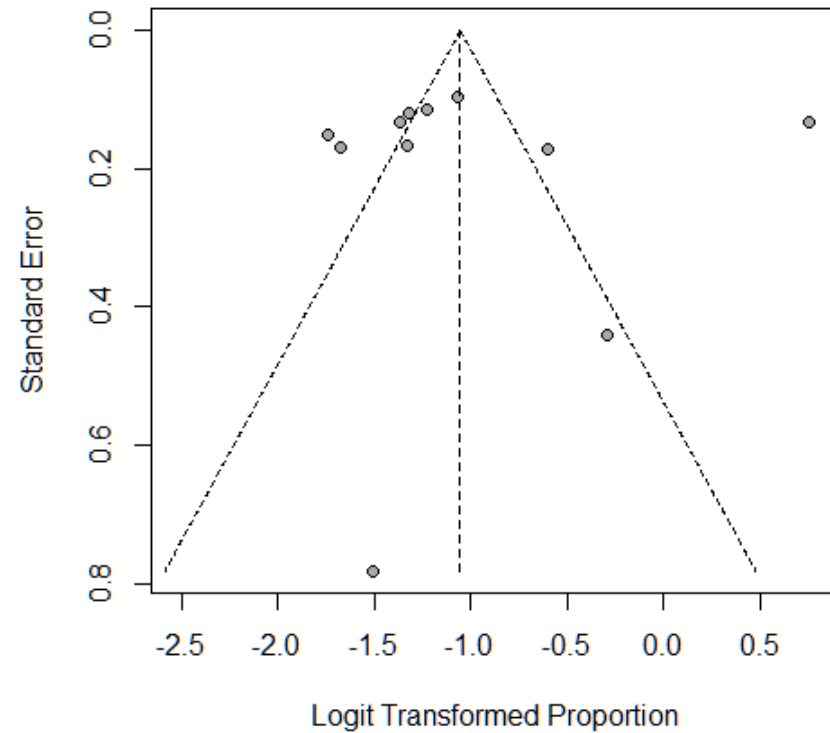

Eggers test= -0.005, slope= -1.032,  $p= 0.9992$ .

Begg's and Mazumdar rank correlation test= 1.0,  $p=0.9379$ .

**Figure S25. Funnel plot assessment for studies reporting on assault presentations as an indicator of intimate partner violence**

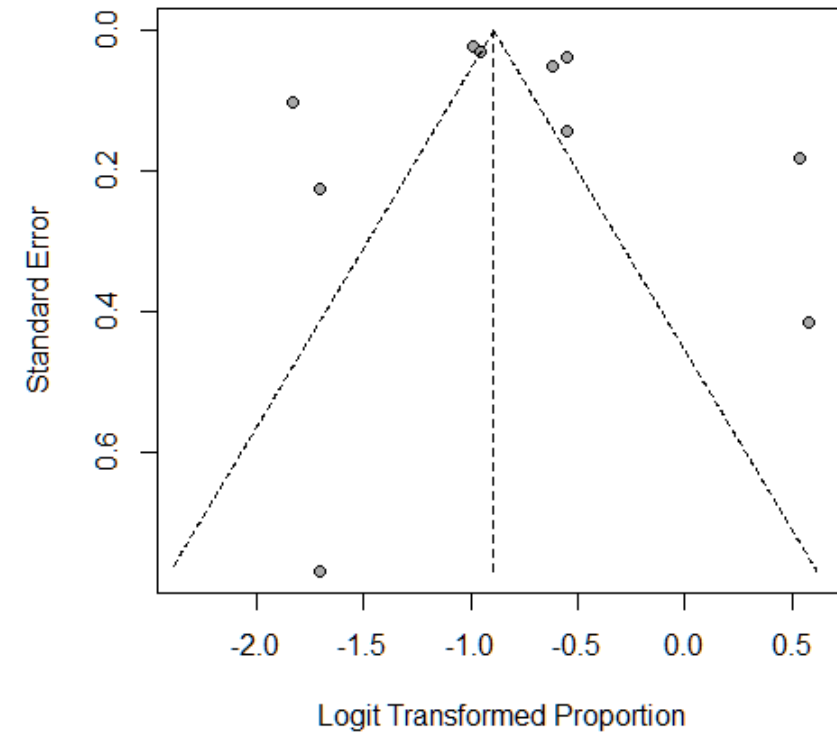

Eggers test= 1.33, slope=-0.928,  $p=0.6582$ .

Begg's and Mazumdar rank correlation test= 3.0,  $p=0.7884$ .

---

**Table S12. Online supplementary references**

---

1. CPRD. Bibliography 2019 [Available from: <https://cprd.com/bibliography>.
2. Fone DL, Morgan J, Fry R, et al. Change in alcohol outlet density and alcohol-related harm to population health (CHALICE): a comprehensive record-linked database study in Wales. *Public Health Research* 2016;4(3)
3. NHS digital. Part 1: Alcohol-related hospital admissions. Estimated alcohol-related hospital admissions - narrow measure. In: NHS, ed. England, 2018.
4. Paranjothy S, Evans A, Bandyopadhyay A, et al. Risk of emergency hospital admission in children associated with mental disorders and alcohol misuse in the household: an electronic birth cohort study. *The Lancet Public Health* 2018;3(6):e279-e88.
5. Dibben C, Atherton I, Doherty J, et al. Differences in 5-year survival after a 'homeless' or 'housed' drugs-related hospital admission: a study of 15–30-year olds in Scotland. *Journal of Epidemiology & Community Health* 2011;65(9):780-85.
6. European Monitoring Centre for Drugs and Drug Addiction. Drug-related deaths (DRD). Methods and definitions. . In: EMCDDA, ed., 2017.
7. NHS Scotland. National Records of Scotland. Drug-related deaths in Scotland in 2015. Statistics of drug-related deaths in 2015 and earlier years, broken down by age, sex, selected drugs reported, underlying cause of death and NHS Board and council areas. . In: NHS Scotland, ed. Scotland, 2016:26.
8. ONS. Deaths related to drug poisoning in England and Wales: 2017 registrations. , 2017.
9. SAMHSA'S CENTER FOR THE APPLICATION OF PREVENTION TECHNOLOGIES. Using International Classification of Diseases (ICD) Codes to Assess Opioid-Related Overdose Deaths, 2018.
10. Abel K, Heuvelman H, Jörgensen L, et al. Severe bereavement stress during the prenatal and childhood periods and risk of psychosis in later life: population based cohort study. *Bmj* 2014;348:f7679.
11. Agerbo E, Nordentoft M, Mortensen PB. Familial, psychiatric, and socioeconomic risk factors for suicide in young people: nested case-control study. *Bmj* 2002;325(7355):74.
12. Weitoft GR, Hjern A, Haglund B, et al. Mortality, severe morbidity, and injury in children living with single parents in Sweden: a population-based study. *The Lancet* 2003;361(9354):289-95.
13. Wood D, Halfon N, Scarlata D, et al. Impact of family relocation on children's growth, development, school function, and behavior. *JAMA* 1993;270(11):1334-38.
14. Economou A, Grey, M., McGregor, J., Craddock, N., Lyons, R. A., Owen, M. J., ... & Lloyd, K. . The health informatics cohort enhancement project (HICE): using routinely collected primary care data to identify people with a lifetime diagnosis of psychotic disorder. . *BMC research notes*, 5(1), 95 2012
15. John A, McGregor, J., Fone, D., Dunstan, F., Cornish, R., Lyons, R. A., & Lloyd, K. R. . Case-finding for common mental disorders of anxiety and depression in primary care: an external validation of routinely collected data. . *BMC medical informatics and decision making*, 16(1), 35 2016
16. Nilsson SF, Laursen TM, Hjorthøj C, et al. Risk of psychiatric disorders in offspring of parents with a history of homelessness during childhood and adolescence in Denmark: a nationwide, register-based, cohort study. *The Lancet Public Health* 2017;2(12):e541-e50.
17. Siegenthaler E, Munder T, Egger M. Effect of preventive interventions in mentally ill parents on the mental health of the offspring: systematic review and meta-analysis. *Journal of the American Academy of Child & Adolescent Psychiatry* 2012;51(1):8-17. e8.
18. Björkenstam C, Kosidou K, Björkenstam E. Childhood adversity and risk of suicide: cohort study of 548 721 adolescents and young adults in Sweden. *bmj* 2017;357:j1334.
19. Carr MJ, Ashcroft DM, Kontopantelis E, et al. Clinical management following self-harm in a UK-wide primary care cohort. *Journal of affective disorders* 2016;197:182-88.
20. Doyle M, David While, Pearl LH Mok, Kirsten Windfuhr, Darren M. Ashcroft, Evangelos Kontopantelis, Carolyn A. Chew-Graham, Louis Appleby, Jenny Shaw, and Roger T. Webb. . Suicide risk in primary care patients diagnosed with a personality disorder: a nested case control study." . *BMC family practice* 17, no 1 (2016): 106 2016
21. Morgan C, Webb RT, Carr MJ, et al. Incidence, clinical management, and mortality risk following self harm among children and adolescents: cohort study in primary care. *bmj* 2017;359:j4351.
22. Baker R, Kendrick D, Tata LJ, et al. Association between maternal depression and anxiety episodes and rates of childhood injuries: a cohort study from England. *Injury prevention* 2017:injuryprev-2016-042294.
23. Baker R, Tata LJ, Kendrick D, et al. Differing patterns in thermal injury incidence and hospitalisations among 0–4 year old children from England. *burns* 2016;42(7):1609-16.

24. Paskins Z WR, Sultan AA, Muller S, Blagojevic-Bucknall M, Helliwell T, Packham J, Hider S, Roddy E, Mallen C. Risk of fragility fracture among patients with late-onset psoriasis: a UK population-based study. *Osteoporosis International* 2018(Mar 24:1-6.)
25. Herbert A, Gilbert R, Cottrell D, et al. Causes of death up to 10 years after admissions to hospitals for self-inflicted, drug-related or alcohol-related, or violent injury during adolescence: a retrospective, nationwide, cohort study. *The Lancet* 2017;390(10094):577-87.
26. Herbert A, Gilbert R, González-Izquierdo A, et al. Violence, self-harm and drug or alcohol misuse in adolescents admitted to hospitals in England for injury: a retrospective cohort study. *BMJ open* 2015;5(2):e006079.
27. Wilcox HC, Kuramoto SJ, Lichtenstein P, et al. Psychiatric morbidity, violent crime, and suicide among children and adolescents exposed to parental death. *Journal of the American Academy of Child & Adolescent Psychiatry* 2010;49(5):514-23.
28. Anda RF, Butchart A, Felitti VJ, et al. Building a framework for global surveillance of the public health implications of adverse childhood experiences. *American journal of preventive medicine* 2010;39(1):93-98.
29. Hughes K, Mark A. Bellis, Katherine A. Hardcastle, Dinesh Sethi, Alexander Butchart, Christopher Mikton, Lisa Jones, and Michael P. Dunne. . The effect of multiple adverse childhood experiences on health: a systematic review and meta-analysis. *The Lancet Public Health* 2017(e356-e366.)
30. Nissen F, Quint JK, Morales DR, et al. How to validate a diagnosis recorded in electronic health records. *Breathe* 2019;15(1):64-68.
31. McCormick N, Lacaille D, Bhole V, et al. Validity of myocardial infarction diagnoses in administrative databases: a systematic review. *PloS one* 2014;9(3):e92286.
32. Maguire S, Mann M, Sibert J, et al. Are there patterns of bruising in childhood which are diagnostic or suggestive of abuse? A systematic review. *Archives of disease in childhood* 2005;90(2):182-86.
33. Schwarzer G, Chemaitelly H, Abu-Raddad LJ, et al. Seriously misleading results using inverse of Freeman-Tukey double arcsine transformation in meta-analysis of single proportions. *Research synthesis methods* 2019

---

**Table S13. References of included studies in this systematic review and meta-analysis**

---

34. Lind JN, Ailes EC, Alter CC, et al. Leveraging Existing Birth Defects Surveillance Infrastructure to Build Neonatal Abstinence Syndrome Surveillance Systems—Illinois, New Mexico, and Vermont, 2015–2016. *Morbidity and Mortality Weekly Report* 2019;68(7):177.
35. Maalouf FI, Cooper WO, Stratton SM, et al. Positive predictive value of administrative data for neonatal abstinence syndrome. *Pediatrics* 2019;143(1):e20174183.
36. Lind JN, Petersen EE, Lederer PA, et al. Infant and maternal characteristics in neonatal abstinence syndrome—selected hospitals in Florida, 2010–2011. *MMWR Morbidity and mortality weekly report* 2015;64(8):213.
37. Phillips-Bell GS, Holicky A, Lind JN, et al. Assessing the Burden of Neonatal Abstinence Syndrome: Validation of: ICD-9-CM: Data, Florida, 2010-2011. *Journal of Public Health Management and Practice* 2019
38. Chisamore B, Labana S, Blitz S, et al. A comparison of morphine delivery in neonatal opioid withdrawal. *Substance abuse: research and treatment* 2016;10:SART. S34550.
39. Yam P, Lok L, Eastwood J, et al. Validation of hospital discharge coding for neonatal abstinence syndrome. *Acta Paediatrica* 2019
40. Patrick SW, Dudley J, Martin PR, et al. Prescription opioid epidemic and infant outcomes. *Pediatrics* 2015;135(5):842-50.
41. Alsaleem M, Berkelhamer SK, Wilding GE, et al. Effects of Partially Hydrolyzed Formula on Severity and Outcomes of Neonatal Abstinence Syndrome. *American journal of perinatology* 2019
42. Umer A, Loudin S, Maxwell S, et al. Capturing the statewide incidence of neonatal abstinence syndrome in real time: the West Virginia experience. *Pediatric research* 2019;85(5):607.
43. Huybrechts KF, Bateman BT, Desai RJ, et al. Risk of neonatal drug withdrawal after intrauterine co-exposure to opioids and psychotropic medications: cohort study. *BMJ* 2017;358:j3326.
44. Miller L, Tolliver R, Druschel C, et al. Fetal alcohol syndrome--Alaska, Arizona, Colorado, and New York, 1995-1997. *MMWR Morbidity and mortality weekly report* 2002;51(20):433.
45. Egeland GM, Perham-Hester KA, Gessner BD, et al. Fetal alcohol syndrome in Alaska, 1977 through 1992: an administrative prevalence derived from multiple data sources. *American Journal of Public Health* 1998;88(5):781-86.
46. Welty T, Canfield L, Selva K. Use of international classification of diseases coding to identify fetal alcohol syndrome--Indian Health Service facilities, 1981-1992. *MMWR Morbidity and mortality weekly report* 1995;44(13):253.

47. Miller LA, Shaikh T, Stanton C, et al. Surveillance for fetal alcohol syndrome in Colorado. *Public Health Reports* 1995;110(6):690.
48. Harris K, Bucens I. Prevalence of fetal alcohol syndrome in the Top End of the Northern Territory. *Journal of paediatrics and child health* 2003;39(7):528-33.
49. Allen K, Riley M, Goldfeld S, et al. Estimating the prevalence of fetal alcohol syndrome in Victoria using routinely collected administrative data. *Australian and New Zealand journal of public health* 2007;31(1):62-66.
50. Fox DJ, Druschel CM. Estimating prevalence of fetal alcohol syndrome (FAS): effectiveness of a passive birth defects registry system. *Birth Defects Research Part A: Clinical and Molecular Teratology* 2003;67(9):604-08.
51. Gumbs GR, Keenan HT, Sevick CJ, et al. Infant abusive head trauma in a military cohort. *Pediatrics* 2013;132(4):668-76.
52. O'donnell M, Nassar N, Jacoby P, et al. Western Australian emergency department presentations related to child maltreatment and intentional injury: population level study utilising linked health and child protection data. *Journal of paediatrics and child health* 2012;48(1):57-65.
53. O'Donnell M, Nassar N, Leonard H, et al. Rates and types of hospitalisations for children who have subsequent contact with the child protection system: a population based case-control study. *Journal of Epidemiology & Community Health* 2010;64(9):784-88.
54. Parrish J, Baldwin-Johnson C, Volz M, et al. Abusive head trauma among children in Alaska: a population-based assessment. *International journal of circumpolar health* 2013;72(1):21216.
55. Schnitzer PG, Slusher P, Van Tuinen M. Child maltreatment in Missouri: combining data for public health surveillance. *American journal of preventive medicine* 2004;27(5):379-84.
56. Raghavan R, Brown DS, Allaire BT, et al. Challenges in using Medicaid claims to ascertain child maltreatment. *Child maltreatment* 2015;20(2):83-91.
57. Hooft AM, Asnes AG, Livingston N, et al. The accuracy of ICD codes: identifying physical abuse in 4 children's hospitals. *Academic pediatrics* 2015;15(4):444-50.
58. McKenzie K, Scott DA. Quantity of documentation of maltreatment risk factors in injury-related paediatric hospitalisations. *BMC public health* 2012;12(1):563.
59. Krawiec C, Gerard S, Iriana S, et al. What we can learn from failure: an EHR-based child protection alert system. *Child maltreatment* 2019:1077559519848845.
60. Karatekin C, Almy B, Mason SM, et al. Health-care utilization patterns of maltreated youth. *Journal of pediatric psychology* 2018;43(6):654-65.
61. Paroskie A, Carpenter SL, Lowen DE, et al. A two-center retrospective review of the hematologic evaluation and laboratory abnormalities in suspected victims of non-accidental injury. *Child abuse & neglect* 2014;38(11):1794-800.
62. Garza HH. Diagnostic Coding of Physical Abuse Among Patients Evaluated by A Multidisciplinary Child Protection Team in A Pediatric Level I Trauma Center. 2019
63. Wu M-F, Lu T-H, Lin C-J, et al. Risk factors and physical signs of child abuse in hospitalized children in Taiwan. *Children and Youth Services Review* 2015;58:137-41.
64. Berger RP, Parks S, Fromkin J, et al. Assessing the accuracy of the International Classification of Diseases codes to identify abusive head trauma: a feasibility study. *Injury prevention* 2013;21(e1):e133-e37.
65. Durand MB, McLaughlin CM, Imagawa KK, et al. Identifying targets to improve coding of child physical abuse at a pediatric trauma center. *Journal of trauma nursing* 2019;26(5):239-42.
66. Gessner BD, Moore M, Hamilton B, et al. The incidence of infant physical abuse in Alaska. *Child abuse & neglect* 2004;28(1):9-23.
67. Risen SR, Suskauer SJ, DeMatt EJ, et al. Functional outcomes in children with abusive head trauma receiving inpatient rehabilitation compared with children with nonabusive head trauma. *The Journal of pediatrics* 2014;164(3):613-19. e2.
68. Högborg U, Sennerstam R, Wester K, et al. Medical diagnoses among infants at entry in out-of-home care: A Swedish population-register study. *Health Science Reports* 2019:e133.
69. Somji Z, Plint A, McGahern C, et al. Diagnostic coding of abuse related fractures at two children's emergency departments. *Child abuse & neglect* 2011;35(11):905-14.
70. Tingberg B. Child abuse-clinical investigation, management and nursing approach. 2010
71. Gonzalez-Izquierdo A, Ward A, Smith P, et al. Notifications for child safeguarding from an acute hospital in response to presentations to healthcare by parents. *Child: care, health and development* 2015;41(2):186-93.
72. Evasovich M, Klein R, Muakkassa F, et al. The economic effect of child abuse in the burn unit. *Burns* 1998;24(7):642-45.
73. Sharkey MS, Buesser KE, Gaither JR, et al. Abusive fracture incidence over three decades at a level 1 pediatric trauma center. *Child abuse & neglect* 2018;76:364-71.

74. Lavin LR, Penrod CH, Estrada CM, et al. Fractures in the pediatric emergency department: are we considering abuse? *Clinical pediatrics* 2018;57(10):1161-67.
75. Strait RT, Siegel RM, Shapiro RA. Humeral fractures without obvious etiologies in children less than 3 years of age: when is it abuse? *Pediatrics* 1995;96(4):667-71.
76. Baldwin K, Pandya NK, Wolfgruber H, et al. Femur fractures in the pediatric population: abuse or accidental trauma? *Clinical Orthopaedics and Related Research* 2011;469(3):798-804.
77. Capra L, Levin AV, Howard A, et al. Characteristics of femur fractures in ambulatory young children. *Emerg Med J* 2013;30(9):749-53.
78. Ryznar E, Rosado N, Flaherty EG. Understanding forearm fractures in young children: Abuse or not abuse? *Child abuse & neglect* 2015;47:132-39.
79. Hui C, Joughin E, Goldstein S, et al. Femoral fractures in children younger than three years: the role of nonaccidental injury. *Journal of Pediatric Orthopaedics* 2008;28(3):297-302.
80. Hansoti B, Beattie TF. Limb fractures and nonaccidental injury in children less than 24 months of age. *European journal of emergency medicine* 2008;15(2):63-66.
81. O'Donnell M, Nassar N, Leonard HM, et al. The use of cross-jurisdictional population data to investigate health indicators of child maltreatment. *Medical journal of Australia* 2010;193(3):142-45.
82. Wood JN, Pecker LH, Russo ME, et al. Evaluation and referral for child maltreatment in pediatric poisoning victims. *Child abuse & neglect* 2012;36(4):362-69.
83. Kim PT, McCagg J, Dundon A, et al. Consistent screening of admitted infants with head injuries reveals high rate of nonaccidental trauma. *Journal of pediatric surgery* 2017;52(11):1827-30.
84. Lyons TW, Stack AM, Monuteaux MC, et al. A QI initiative to reduce hospitalization for children with isolated skull fractures. *Pediatrics* 2016;137(6):e20153370.
85. Lane WG, Rubin DM, Monteith R, et al. Racial differences in the evaluation of pediatric fractures for physical abuse. *Jama* 2002;288(13):1603-09.
86. Ettaro L, Berger RP, Songer T. Abusive head trauma in young children: characteristics and medical charges in a hospitalized population. *Child abuse & neglect* 2004;28(10):1099-111.
87. Anderst JD. Assessment of factors resulting in abuse evaluations in young children with minor head trauma. *Child abuse & neglect* 2008;32(3):405-13.
88. Wood JN, Christian CW, Adams CM, et al. Skeletal surveys in infants with isolated skull fractures. *Pediatrics* 2009;123(2):e247-e52.
89. Rangel EL, Cook BS, Bennett BL, et al. Eliminating disparity in evaluation for abuse in infants with head injury: use of a screening guideline. *Journal of pediatric surgery* 2009;44(6):1229-35.
90. Laskey AL, Stump TE, Hicks RA, et al. Yield of skeletal surveys in children ≤ 18 months of age presenting with isolated skull fractures. *The Journal of pediatrics* 2013;162(1):86-89.
91. Payne BS, Kutz TJ, Di Maio A, et al. Prevalence of retinal hemorrhages in infants presenting with isolated long bone fractures and evaluation for abuse. *The Journal of emergency medicine* 2016;51(4):365-69.
92. Hooft A, Ronda J, Schaeffer P, et al. Identification of physical abuse cases in hospitalized children: accuracy of International Classification of Diseases codes. *The Journal of pediatrics* 2013;162(1):80-85.
93. Thyen U, Leventhal JM, Yazdgerdi SR, et al. Concerns about child maltreatment in hospitalized children. *Child abuse & neglect* 1997;21(2):187-98.
94. Keenan HT, Marshall SW, Nocera MA, et al. Increased incidence of inflicted traumatic brain injury in children after a natural disaster. *American journal of preventive medicine* 2004;26(3):189-93.
95. Ricci L, Giantris A, Merriam P, et al. Abusive head trauma in Maine infants: medical, child protective, and law enforcement analysis. *Child abuse & neglect* 2003;27(3):271-83.
96. Myhre M, Grøgaard J, Dyb G, et al. Traumatic head injury in infants and toddlers. *Acta paediatrica* 2007;96(8):1159-63.
97. Tzioumi D, Oates RK. Subdural hematomas in children under 2 years. Accidental or inflicted? A 10-year experience. *Child abuse & neglect* 1998;22(11):1105-12.
98. Kernic MA, Wolf ME, Holt VL. Rates and relative risk of hospital admission among women in violent intimate partner relationships. *American Journal of Public Health* 2000;90(9):1416.
99. Lipsky S, Caetano R, Roy-Byrne P. Racial and ethnic disparities in police-reported intimate partner violence and risk of hospitalization among women. *Women's health issues* 2009;19(2):109-18.
100. Yau RK, Stayton CD, Davidson LL. Indicators of intimate partner violence: identification in emergency departments. *The Journal of emergency medicine* 2013;45(3):441-49.
101. Fanslow JL, Norton RN, Spinola CG. Indicators of assault-related injuries among women presenting to the emergency department. *Annals of emergency medicine* 1998;32(3):341-48.



102. Brown S, Malcoe L, Carson E. Intimate partner violence injuries--Oklahoma, 2002. *MMWR: Morbidity and mortality weekly report* 2005;54(41):1041-45.
103. Biroscak BJ, Smith PK, Roznowski H, et al. Intimate partner violence against women: findings from one state's ED surveillance system. *Journal of Emergency Nursing* 2006;32(1):12-16.
104. Saltzman LE, Mahendra RR, Ikeda RM, et al. Utility of hospital emergency department data for studying intimate partner violence. *Journal of marriage and family* 2005;67(4):960-70.
105. Ranney ML, Mello MJ. A comparison of female and male adolescent victims of violence seen in the emergency department. *The Journal of emergency medicine* 2011;41(6):701-06.
106. Kivelä S, Leppäkoski T, Ruohoniemi J, et al. The Documentation and Characteristics of Hospitalized IPV Patients Using Electronic Medical Records Data: a Follow-Up Descriptive Study. *Journal of Family Violence* 2019:1-9.
107. Muelleman RL, Lenaghan PA, Pakieser RA. Battered women: injury locations and types. *Annals of emergency medicine* 1996;28(5):486-92.
108. Bonomi AE, Anderson ML, Reid RJ, et al. Medical and psychosocial diagnoses in women with a history of intimate partner violence. *Archives of internal medicine* 2009;169(18):1692-97.
109. Wong JY-H, Choi AW-M, Fong DY-T, et al. A comparison of intimate partner violence and associated physical injuries between cohabitating and married women: a 5-year medical chart review. *BMC public health* 2016;16(1):1207.
110. Schafer SD, Drach LL, Hedberg K, et al. Using diagnostic codes to screen for intimate partner violence in Oregon emergency departments and hospitals. *Public Health Reports* 2008;123(5):628-35.
111. Muelleman RL, Liewer JD. How often do women in the emergency department without intimate violence injuries return with such injuries? *Academic emergency medicine* 1998;5(10):982-85.
112. Clark TJ, Renner LM, Sobel RK, et al. Intimate partner violence: an underappreciated etiology of orbital floor fractures. *Ophthalmic Plastic & Reconstructive Surgery* 2014;30(6):508-11.
113. Arosarena OA, Fritsch TA, Hsueh Y, et al. Maxillofacial injuries and violence against women. *Archives of facial plastic surgery* 2009;11(1):48-52.
114. Cohen AR, Clark TJ, Renner LM, et al. Intimate partner violence as a mechanism of traumatic ocular injury in women. *Canadian Journal of Ophthalmology* 2019;54(3):355-58.
115. Goldberg SH, McRill CM, Bruno CR, et al. Orbital fractures due to domestic violence: an epidemiologic study. *Orbit* 2000;19(3):143-54.

**Table S14. Meta-analyses Of Observational Studies in Epidemiology Checklist (MOOSE)**

A reporting checklist for Authors, Editors, and Reviewers of Meta-analyses of Observational Studies. You must report the page number in your manuscript where you consider each of the items listed in this checklist. If you have not included this information, either revise your manuscript accordingly before submitting or note N/A.

| <b>Reporting Criteria</b>                                                                                                                                                                                                                                                    | <b>Reported on page</b>                         |
|------------------------------------------------------------------------------------------------------------------------------------------------------------------------------------------------------------------------------------------------------------------------------|-------------------------------------------------|
| <b>Reporting of Background</b>                                                                                                                                                                                                                                               |                                                 |
| Problem definition                                                                                                                                                                                                                                                           | 2,3,6                                           |
| Hypothesis statement                                                                                                                                                                                                                                                         | 2,3,6                                           |
| Description of Study Outcome(s)                                                                                                                                                                                                                                              | 2,3, 6, 8, table 1-2, figure 3                  |
| Type of exposure or intervention used                                                                                                                                                                                                                                        | 2, 4, 7, table 1-2, table 3                     |
| Type of study design used                                                                                                                                                                                                                                                    | 2, 3, 6                                         |
| Study population                                                                                                                                                                                                                                                             | 2, 7, table 2                                   |
| <b>Reporting of Search Strategy</b>                                                                                                                                                                                                                                          |                                                 |
| Qualifications of searchers (eg, librarians and investigators)                                                                                                                                                                                                               | 6, supplement tables 1-2                        |
| Search strategy, including time period included in the synthesis and keywords                                                                                                                                                                                                | 6, supplement tables 1-2                        |
| Effort to include all available studies, including contact with authors                                                                                                                                                                                                      | 6,7,8, and supplement tables 1-2                |
| Databases and registries searched                                                                                                                                                                                                                                            | 7, supplement tables 1-2                        |
| Search software used, name and version, including special features used (eg, explosion)                                                                                                                                                                                      | 7, supplement tables 1-2                        |
| Use of hand searching (eg, reference lists of obtained articles)                                                                                                                                                                                                             | 6, supplement tables 1-2                        |
| List of citations located and those excluded, including justification                                                                                                                                                                                                        | Available upon request                          |
| Method for addressing articles published in languages other than English                                                                                                                                                                                                     | Supplement table 1                              |
| Method of handling abstracts and unpublished studies                                                                                                                                                                                                                         | 7, 8                                            |
| Description of any contact with authors                                                                                                                                                                                                                                      | 6, 8, appendix tables 1-2                       |
| <b>Reporting of Methods</b>                                                                                                                                                                                                                                                  |                                                 |
| Description of relevance or appropriateness of studies assembled for assessing the hypothesis to be tested                                                                                                                                                                   | 7-9                                             |
| Rationale for the selection and coding of data (eg, sound clinical principles or convenience)                                                                                                                                                                                | 7-9                                             |
| Documentation of how data were classified and coded (eg, multiple raters, blinding, and interrater reliability)                                                                                                                                                              | 7-9                                             |
| Assessment of confounding (eg, comparability of cases and controls in studies where appropriate).                                                                                                                                                                            | Table 1, supplement table 3                     |
| <b>Reporting Criteria</b>                                                                                                                                                                                                                                                    |                                                 |
| Assessment of study quality, including blinding of quality assessors; stratification or regression on possible predictors of study results                                                                                                                                   | 8, supplement table 3 & 6                       |
| Assessment of heterogeneity                                                                                                                                                                                                                                                  | 8-9                                             |
| Description of statistical methods (eg, complete description of fixed or random effects models, justification of whether the chosen models account for predictors of study results, dose-response models, or cumulative meta-analysis) in sufficient detail to be replicated | 8-9, supplement table 4                         |
| Provision of appropriate tables and graphics                                                                                                                                                                                                                                 | Tables 1-3, figure 1 + supplement               |
| <b>Reporting of Results</b>                                                                                                                                                                                                                                                  |                                                 |
| Table giving descriptive information for each study included                                                                                                                                                                                                                 | supplement table 6                              |
| Results of sensitivity testing (eg, subgroup analysis)                                                                                                                                                                                                                       | supplement figure 20-21, supplement tables 9-10 |
| Indication of statistical uncertainty of findings                                                                                                                                                                                                                            | Table 3, 10-14                                  |
| <b>Reporting of Discussion</b>                                                                                                                                                                                                                                               |                                                 |
| Quantitative assessment of bias (eg, publication bias)                                                                                                                                                                                                                       | 14, supplement figures 24-27                    |
| Justification for exclusion (eg, exclusion of non-English-language citations)                                                                                                                                                                                                | Figure 1/                                       |
| Assessment of quality of included studies                                                                                                                                                                                                                                    | 10, appendix tables 3 & 6                       |
| <b>Reporting of Conclusions</b>                                                                                                                                                                                                                                              |                                                 |
| Consideration of alternative explanations for observed results                                                                                                                                                                                                               | 16, 17                                          |
| Generalization of the conclusions (ie, appropriate for the data presented and within the domain of the literature review)                                                                                                                                                    | 14-17                                           |
| Guidelines for future research                                                                                                                                                                                                                                               | 15-17                                           |
| Disclosure of funding source                                                                                                                                                                                                                                                 | 18                                              |

*Adapted From:* Stroup DF, Berlin JA, Morton SC, Olkin I, Williamson GD, Rennie D, Moher D, Becker BJ, Sipe TA, Thacker SB. Meta-analysis of observational studies in epidemiology: a proposal for reporting. *JAMA*, 2000 Apr 19;283(15):2008-12.

**Table S15. Preferred Reporting Items for a Systematic Review and Meta-analysis of Diagnostic Test Accuracy Studies (PRISMA-DTA)**

| Section/topic                   | #  | Checklist Item                                                                                                                                                                                                                                                                                                                                                                                                                           | Reported on page #                                            |
|---------------------------------|----|------------------------------------------------------------------------------------------------------------------------------------------------------------------------------------------------------------------------------------------------------------------------------------------------------------------------------------------------------------------------------------------------------------------------------------------|---------------------------------------------------------------|
| <b>TITLE / ABSTRACT</b>         |    |                                                                                                                                                                                                                                                                                                                                                                                                                                          |                                                               |
| Title                           | 1  | Identify the report as a systematic review (+/- meta-analysis) of diagnostic test accuracy (DTA) studies.                                                                                                                                                                                                                                                                                                                                | 1: title includes "positive predictive values"                |
| Abstract                        | 2  | Abstract: <a href="#">See separate PRISMA-DTA for abstracts</a> . Due to word limit restrictions we include 10/12 abstract item recommendations. We omitted: "4. List key databases searched" and "5. Risk of bias assessment" in abstract.                                                                                                                                                                                              | 3,4.                                                          |
| <b>INTRODUCTION</b>             |    |                                                                                                                                                                                                                                                                                                                                                                                                                                          |                                                               |
| Rationale                       | 3  | Describe the rationale for the review in the context of what is already known.                                                                                                                                                                                                                                                                                                                                                           | 4,5-6                                                         |
| Clinical role of index test     | D1 | State the scientific and clinical background, including the intended use and clinical role of the index test, and if applicable, the rationale for minimally acceptable test accuracy (or minimum difference in accuracy for comparative design).                                                                                                                                                                                        | 7,8                                                           |
| Objectives                      | 4  | Provide an explicit statement of question(s) being addressed in terms of participants, index test(s), and target condition(s).                                                                                                                                                                                                                                                                                                           | 7, table 1                                                    |
| <b>METHODS</b>                  |    |                                                                                                                                                                                                                                                                                                                                                                                                                                          |                                                               |
| Protocol and registration       | 5  | Indicate if a review protocol exists, if and where it can be accessed (e.g., Web address), and, if available, provide registration information including registration number.                                                                                                                                                                                                                                                            | 6                                                             |
| Eligibility criteria            | 6  | Specify study characteristics (participants, setting, index test(s), reference standard(s), target condition(s), and study design) and report characteristics (e.g., years considered, language, publication status) used as criteria for eligibility, giving rationale.                                                                                                                                                                 | 7,8                                                           |
| Information sources             | 7  | Describe all information sources (e.g., databases with dates of coverage, contact with study authors to identify additional studies) in the search and date last searched.                                                                                                                                                                                                                                                               | 6 & supplement table 1                                        |
| Search                          | 8  | Present full search strategies for all electronic databases and other sources searched, including any limits used, such that they could be repeated.                                                                                                                                                                                                                                                                                     | 6 & supplement table 1                                        |
| Study selection                 | 9  | State the process for selecting studies (i.e., screening, eligibility, included in systematic review, and, if applicable, included in the meta-analysis).                                                                                                                                                                                                                                                                                | 6-8                                                           |
| Data collection process         | 10 | Describe method of data extraction from reports (e.g., piloted forms, independently, in duplicate) and any processes for obtaining and confirming data from investigators.                                                                                                                                                                                                                                                               | 8                                                             |
| Definitions for data extraction | 11 | Provide definitions used in data extraction and classifications of target condition(s), index test(s), reference standard(s) and other characteristics (e.g. study design, clinical setting).                                                                                                                                                                                                                                            | 7,8                                                           |
| Risk of bias and applicability  | 12 | Describe methods used for assessing risk of bias in individual studies and concerns regarding the applicability to the review question.                                                                                                                                                                                                                                                                                                  | 8, supplement table 6                                         |
| Diagnostic accuracy measures    | 13 | State the principal diagnostic accuracy measure(s) reported (e.g. sensitivity, specificity) and state the unit of assessment (e.g. per-patient, per-lesion).                                                                                                                                                                                                                                                                             | 8                                                             |
| Synthesis of results            | 14 | Describe methods of handling data, combining results of studies and describing variability between studies. This could include, but is not limited to: a) handling of multiple definitions of target condition. b) handling of multiple thresholds of test positivity, c) handling multiple index test readers, d) handling of indeterminate test results, e) grouping and comparing tests, f) handling of different reference standards | 8,9 + additional descriptions provided in all table footnotes |

| Section/topic                                                                                                                                                                                                                                                                                                                                                                                                                    | #  | PRISMA-DTA Checklist Item                                                                                                                                                                                                                                                                         | Reported on page #                |
|----------------------------------------------------------------------------------------------------------------------------------------------------------------------------------------------------------------------------------------------------------------------------------------------------------------------------------------------------------------------------------------------------------------------------------|----|---------------------------------------------------------------------------------------------------------------------------------------------------------------------------------------------------------------------------------------------------------------------------------------------------|-----------------------------------|
| Meta-analysis                                                                                                                                                                                                                                                                                                                                                                                                                    | D2 | Report the statistical methods used for meta-analyses, if performed.                                                                                                                                                                                                                              | 6-7                               |
| Additional analyses                                                                                                                                                                                                                                                                                                                                                                                                              | 16 | Describe methods of additional analyses (e.g., sensitivity or subgroup analyses, meta-regression), if done, indicating which were pre-specified.                                                                                                                                                  | 8,9                               |
| <b>RESULTS</b>                                                                                                                                                                                                                                                                                                                                                                                                                   |    |                                                                                                                                                                                                                                                                                                   |                                   |
| Study selection                                                                                                                                                                                                                                                                                                                                                                                                                  | 17 | Provide numbers of studies screened, assessed for eligibility, included in the review (and included in meta-analysis, if applicable) with reasons for exclusions at each stage, ideally with a flow diagram.                                                                                      | Figure 1                          |
| Study characteristics                                                                                                                                                                                                                                                                                                                                                                                                            | 18 | For each included study provide citations and present key characteristics including: a) participant characteristics (presentation, prior testing), b) clinical setting, c) study design, d) target condition definition, e) index test, f) reference standard, g) sample size, h) funding sources | Table 1-3 & supplement Tables 6-8 |
| Risk of bias and applicability                                                                                                                                                                                                                                                                                                                                                                                                   | 19 | Present evaluation of risk of bias and concerns regarding applicability for each study.                                                                                                                                                                                                           | supplement table 6                |
| Results of individual studies                                                                                                                                                                                                                                                                                                                                                                                                    | 20 | For each analysis in each study (e.g. unique combination of index test, reference standard, and positivity threshold) report 2x2 data (TP, FP, FN, TN) with estimates of diagnostic accuracy and confidence intervals, ideally with a forest or receiver operator characteristic (ROC) plot.      | supplement figures 1-19           |
| Synthesis of results                                                                                                                                                                                                                                                                                                                                                                                                             | 21 | Describe test accuracy, including variability; if meta-analysis was done, include results and confidence intervals.                                                                                                                                                                               | Table 3, 10-14                    |
| Additional analysis                                                                                                                                                                                                                                                                                                                                                                                                              | 23 | Give results of additional analyses, if done (e.g., sensitivity or subgroup analyses, meta-regression; analysis of index test: failure rates, proportion of inconclusive results, adverse events).                                                                                                | 13, supplement figures 20, 21     |
| <b>DISCUSSION</b>                                                                                                                                                                                                                                                                                                                                                                                                                |    |                                                                                                                                                                                                                                                                                                   |                                   |
| Summary of evidence                                                                                                                                                                                                                                                                                                                                                                                                              | 24 | Summarize the main findings including the strength of evidence.                                                                                                                                                                                                                                   | 14                                |
| Limitations                                                                                                                                                                                                                                                                                                                                                                                                                      | 25 | Discuss limitations from included studies (e.g. risk of bias and concerns regarding applicability) and from the review process (e.g. incomplete retrieval of identified research).                                                                                                                | 15-17                             |
| Conclusions                                                                                                                                                                                                                                                                                                                                                                                                                      | 26 | Provide a general interpretation of the results in the context of other evidence. Discuss implications for future research and clinical practice (e.g. the intended use and clinical role of the index test).                                                                                     | 15, 17                            |
| <b>FUNDING</b>                                                                                                                                                                                                                                                                                                                                                                                                                   |    |                                                                                                                                                                                                                                                                                                   |                                   |
| Funding                                                                                                                                                                                                                                                                                                                                                                                                                          | 27 | For the systematic review, describe the sources of funding and other support and the role of the funders.                                                                                                                                                                                         | 18                                |
| <p><i>Adapted From:</i> McInnes MDF, Moher D, Thombs BD, McGrath TA, Bossuyt PM, The PRISMA-DTA Group (2018). Preferred Reporting Items for a Systematic Review and Meta-analysis of Diagnostic Test Accuracy Studies: The PRISMA-DTA Statement. JAMA. 2018 Jan 23;319(4):388-396. doi: 10.1001/jama.2017.19163.</p> <p>For more information, visit: <a href="http://www.prisma-statement.org">www.prisma-statement.org</a>.</p> |    |                                                                                                                                                                                                                                                                                                   |                                   |
| part 2 of 2                                                                                                                                                                                                                                                                                                                                                                                                                      |    |                                                                                                                                                                                                                                                                                                   |                                   |
